# Supplementary material for: Measuring the Scope of Prior Authorization Policies: Applying Private Insurer Rules to Medicare Part B
Source: PubMed Central journal article supplement — JAMA Health Forum. Author manuscript; Available in PMC 2022 Feb 7. (PMC8796979; doi:10.1001/jamahealthforum.2021.0859), 2021-05-28
Supplement: jamahealthforum-e210859-s001.pdf [file jamahealthforum-e210859-s001.pdf]

## Supplemental Online Content

Schwartz AL, Brennan TA, Verbrugge DJ, Newhouse JP. Measuring the scope of prior authorization policies: applying private insurer rules to Medicare Part B. *JAMA Health Forum*. 2021;2(5):e10859. doi:10.1001/jamahealthforum.2021.0859

**eAppendix.** Methods

**eReferences.**

**eTable 1.** Service Codes, Category, Annual Spending and Annual Incidence

**eTable 2.** Clinician Annual Risk of PA Service, by Specialty

**eFigure.** Projected Savings From Prior Authorization in Fee-For-Service Medicare

This supplemental material has been provided by the authors to give readers additional information about their work.

## **eAppendix. Methods**

### **Service-Specific Exclusion Criteria**

The list of services requiring prior authorization during the study period was nearly identical between Medicare Advantage and non-Medicare (commercial) plans. Whether a service required prior authorization generally depended only on the HCPCS code defining a service. However, for some services, the prior authorization requirement depended on additional criteria. During the study period, several categories of services did not require prior authorization if they were performed in an inpatient hospital setting, during a hospital observation stay, or during an emergency department visit. This place of service restriction applied to radiology services, radiation oncology services, cardiac catheterization, echocardiography, and polysomnography.

For these categories of prior authorization services, we operationalized the place of service restrictions as follows. We excluded prior authorization services that occurred on dates during an inpatient hospital admission as detected in the Medicare Provider Analysis and Review (MEDPAR) file, including the dates of admission and discharge. We excluded prior authorization services that occurred on the same day as emergency department services, defined by the presence of HCPCS codes 99281, 99282, 99283, 99284, or 99285 in the Medicare Carrier or Outpatient files, or the presence of revenue center codes 0450, 0451, 0452, 0456, 0459, or 0981 in the Outpatient file. We excluded prior authorization services that occurred on the same day as a hospital observation stay, defined by the presence of HCPCS codes G0378 and G0379 or revenue center codes 0760, 0761, 0762, or 0769 in the Outpatient file.<sup>1</sup> We did not employ these place of service restrictions for polysomnography out of concern that this restriction might lead to inappropriate classification of outpatient polysomnography services as occurring during

hospital observation stays. Unlike the other prior authorization services subject to place of service rules, polysomnography is rarely performed in emergency or inpatient settings, and some of the revenue center codes used to define hospital observation stays (i.e. 0760, “treatment or observation room-general classification”) may be applied to polysomnography performed in a hospital outpatient setting.

Prior authorization for one service category, breast reconstruction or reduction, was only required in the absence of a breast cancer diagnosis. We therefore excluded claims for patients with breast cancer diagnosed during or prior to 2017 per the Chronic Conditions Warehouse.<sup>2</sup> Per Aetna rules, we excluded claims for dorsal column neurostimulator hardware (HCPCS codes C1767 C1816 C1820) unless they were accompanied by procedure codes for implantation or revision (HCPCS codes 63650, 63655, 63663, 63664, 63685, 63688) within the same claim.

### **Place of Service Assignment**

Place of service was assigned based on the value of the claim line place of service code, which is present in Carrier and DME files. We assigned claim lines to five categories based on the codes presented parenthetically: office (11), inpatient hospital (2), outpatient hospital (19, 22) or home (12), or other (all other codes). We assigned claim lines detected in the Outpatient file to the outpatient hospital category. For each service instance, we assigned the modal location for all claim lines that had the same beneficiary, HCPCS code and service date.

### **Spending Imputation**

Spending was imputed for a prior authorization service if the service only appeared in an Outpatient file claim for which service-level spending was absent, which occurred for 21.5% of

prior authorization services. In 99.96% of such cases, we imputed spending using the mean service-level spending for the same procedure code among Outpatient claims in which service-level spending was present. For the 0.04% of service instances whose procedure codes never appeared with Outpatient service-level spending, we imputed spending with mean service-level spending in the Carrier file, or if absent, with mean spending in the narrow service category encompassing the procedure code.

### **Savings Analysis**

The methods employed in this manuscript allow us to estimate the spending associated with prior authorization services in fee-for-service Medicare. However, these spending estimates should not be construed as causal estimates of savings that would be achieved if fee-for-service Medicare were to adopt prior authorization in the manner that Medicare Advantage plans have. While potential savings depends on aggregate spending on prior authorization services, it is also a function of several other features of a prior authorization program. Gross savings from avoided services also depends on the program's effectiveness at deterring services without adjudicating authorization requests (i.e. a sentinel effect), its rate of rejecting authorization requests, the magnitude of spending on services that complement a prior authorization service (i.e. "cascade" services), and the magnitude of spending on substitute services that replace an avoided service. Calculating *net* insurer savings would require subtracting the costs of insurer administration of the program. If one aimed to estimate net savings at a society level rather than an insurer level, one would also have to account for monetary costs beyond the insurer such as compliance costs for providers.

Given such complexity, rather than attempt to produce a credible estimate of net prior authorization savings, we perform basic calculations to demonstrate how gross savings estimates depend heavily on program features. If one considers only gross savings derived from targeted prior authorization services (i.e. without offsets from substitute services or augmentation from cascade services), there are two sources of savings. These are services deterred by prior authorization without submission of an authorization request and services avoided because an authorization request was rejected. This amount of savings, as a proportion of overall Part B spending, can be expressed as follows:

$$s(d + (1 - d)\bar{r})$$

where  $s$  is the share of Medicare spending on prior authorization services,  $d$  is the proportion of spending on prior authorization services that is deterred by the program without rejection of an application request, and  $\bar{r}$  is the average rate at which prior authorization requests are rejected, weighted by the baseline spending on each service.

In this simplified framework, coarse savings projections are possible with informed assumptions about each variable. As part of our main analysis, we calculated  $s$  as 25%. To estimate  $\bar{r}$ , we employed proprietary data from Aetna on service-level prior authorization rates for their 2017 Medicare Advantage enrollees. We merged HCPCS-level rejection rates to the prior authorization services we detected in fee-for-service Medicare. When a rejection rate was missing (i.e. because no prior authorizations for that HCPCS were requested for Medicare Advantage enrollees that year), we imputed the rejection rate as the average rejection rate in the service categories present in Figure 2. If that average rate was missing, we used the average rate in the broader service category groups presented in Figure 1 (i.e. durable medical equipment or

ambulance, radiology, medical or surgical service, or drug/injectable). We calculated  $\bar{r}$  as the average rejection rates across every prior authorization procedure code, weighted by the fee-for-service spending associated with each code. The weighted average rejection rate was 4.2 percent. This figure differs somewhat from the unweighted average rejection rate across HCPCS codes, 9.2%, and from the average rejection rate when weighted by utilization in fee-for-service Medicare, 6.9%. Notably, the latter figure is very similar to a previously published estimate of a prior authorization service rejection rate (6%) for an anonymous private insurer.<sup>3</sup>

The deterrence rate  $d$  is not readily estimable from our data. Therefore, the Supplement (eFigure1) demonstrates how estimates of gross savings would vary with alternate levels of  $d$ . Using our empirical estimates of  $s$  and  $\bar{r}$ , gross savings projections range from 25% of Part B spending if deterrence were 100% to 1% if deterrence effects were zero. The figure also demonstrates how savings projections are sensitive to alternate estimates of  $\bar{r}$ , ranging from 0% to 25%.

We are unaware of prior studies that quantify the prior authorization deterrence effects and rejection rates for Part B type medical services. One recent study examined the effects of a prior authorization program in Texas targeting certain prescription drugs used to treat work-related disabilities.<sup>4</sup> This policy reduced prescribing of these drugs by half, though the study was not able to differentiate between the relative contributions of deterrence effects and rejections. The paper also reviewed findings from several other studies on prescription drug prior authorization policies, concluding that savings estimates varied dramatically.

## eReferences

1. Sheehy AM, Shi F, Kind AJH. Identifying observation stays in medicare data: Policy

implications of a definition. *J Hosp Med*. 2019;14(2):96-100. doi:10.12788/jhm.3038

2. Chronic Conditions Data Warehouse. <http://www.ccwdata.org/>
3. Kapur K, Gresenz CR, Studdert DM. Managing care: utilization review in action at two capitated medical groups. *Health Affairs* 2003;22(1) Web Exclusive.
4. Dillender M. What happens when the insurer can say no? Assessing prior authorization as a tool to prevent high-risk prescriptions and to lower costs. *J Public Econ*. 2018 Sep 1;165:170–200.

| <b>eTable 1: Service Codes, Category, Annual Spending and Annual Incidence</b> |                                          |                               |                                    |                                 |
|--------------------------------------------------------------------------------|------------------------------------------|-------------------------------|------------------------------------|---------------------------------|
| <b>HCPCS</b>                                                                   | <b>Narrow Service Category</b>           | <b>Broad Service Category</b> | <b>Annual Spending<sup>a</sup></b> | <b>Annual Count<sup>a</sup></b> |
| 0042T                                                                          | CT Scans                                 | Radiology Services            | 6704                               | 29                              |
| 0230T                                                                          | Pain Management                          | Musculoskeletal Services      |                                    |                                 |
| 0231T                                                                          | Pain Management                          | Musculoskeletal Services      |                                    |                                 |
| 0394T                                                                          | Radiation Oncology                       | Radiation Oncology Services   | 1141815                            | 5514                            |
| 0395T                                                                          | Radiation Oncology                       | Radiation Oncology Services   |                                    |                                 |
| 15820                                                                          | Blepharoplasty, Canthopexy, Canthoplasty | Other Services                | 131267                             | 83                              |
| 15821                                                                          | Blepharoplasty, Canthopexy, Canthoplasty | Other Services                | 234553                             | 94                              |
| 15822                                                                          | Blepharoplasty, Canthopexy, Canthoplasty | Other Services                | 1353277                            | 890                             |
| 15823                                                                          | Blepharoplasty, Canthopexy, Canthoplasty | Other Services                | 16735127                           | 10074                           |
| 15830                                                                          | Excision of excessive skin or fat        | Other Services                | 1629530                            | 512                             |
| 15832                                                                          | Excision of excessive skin or fat        | Other Services                | 38938                              | 22                              |
| 15833                                                                          | Excision of excessive skin or fat        | Other Services                |                                    |                                 |
| 15834                                                                          | Excision of excessive skin or fat        | Other Services                |                                    |                                 |
| 15835                                                                          | Excision of excessive skin or fat        | Other Services                |                                    |                                 |
| 15836                                                                          | Excision of excessive skin or fat        | Other Services                | 52876                              | 33                              |
| 15837                                                                          | Excision of excessive skin or fat        | Other Services                |                                    |                                 |
| 15838                                                                          | Excision of excessive skin or fat        | Other Services                |                                    |                                 |
| 15839                                                                          | Excision of excessive skin or fat        | Other Services                | 156536                             | 120                             |
| 15847                                                                          | Excision of excessive skin or fat        | Other Services                | 46165                              | 113                             |
| 15876                                                                          | Excision of excessive skin or fat        | Other Services                |                                    |                                 |
| 15877                                                                          | Excision of excessive skin or fat        | Other Services                | 177550                             | 72                              |
| 15878                                                                          | Excision of excessive skin or fat        | Other Services                |                                    |                                 |
| 15879                                                                          | Excision of excessive skin or fat        | Other Services                |                                    |                                 |
| 19316                                                                          | Breast Reconstruction or Reduction       | Other Services                | 1223161                            | 610                             |
| 19318                                                                          | Breast Reconstruction or Reduction       | Other Services                | 4691550                            | 1058                            |
| 19324                                                                          | Breast Reconstruction or Reduction       | Other Services                |                                    |                                 |
| 19325                                                                          | Breast Reconstruction or Reduction       | Other Services                | 366169                             | 132                             |
| 19328                                                                          | Breast Reconstruction or Reduction       | Other Services                | 708806                             | 578                             |
| 19330                                                                          | Breast Reconstruction or Reduction       | Other Services                | 172942                             | 145                             |
| 19340                                                                          | Breast Reconstruction or Reduction       | Other Services                | 436206                             | 83                              |
| 19342                                                                          | Breast Reconstruction or Reduction       | Other Services                |                                    |                                 |
| 19350                                                                          | Breast Reconstruction or Reduction       | Other Services                | 44885                              | 27                              |
| 19355                                                                          | Breast Reconstruction or Reduction       | Other Services                |                                    |                                 |
| 19357                                                                          | Breast Reconstruction or Reduction       | Other Services                |                                    |                                 |
| 19370                                                                          | Breast Reconstruction or Reduction       | Other Services                | 33901                              | 30                              |
| 19371                                                                          | Breast Reconstruction or Reduction       | Other Services                | 620877                             | 262                             |
| 19380                                                                          | Breast Reconstruction or Reduction       | Other Services                | 178686                             | 50                              |
| 21010                                                                          | Surgical Management of TMJ               | Ear/Nose/Throat Services      |                                    |                                 |
| 21050                                                                          | Surgical Management of TMJ               | Ear/Nose/Throat Services      |                                    |                                 |
| 21060                                                                          | Surgical Management of TMJ               | Ear/Nose/Throat Services      |                                    |                                 |
| 21070                                                                          | Surgical Management of TMJ               | Ear/Nose/Throat Services      |                                    |                                 |



|       |                                                 |                          |          |      |
|-------|-------------------------------------------------|--------------------------|----------|------|
| 21073 | Surgical Management of TMJ                      | Ear/Nose/Throat Services | 13453    | 29   |
| 21122 | Orthognathic surgery procedures and osteotomies | Ear/Nose/Throat Services |          |      |
| 21125 | Orthognathic surgery procedures and osteotomies | Ear/Nose/Throat Services |          |      |
| 21127 | Orthognathic surgery procedures and osteotomies | Ear/Nose/Throat Services |          |      |
| 21141 | Orthognathic surgery procedures and osteotomies | Ear/Nose/Throat Services |          |      |
| 21142 | Orthognathic surgery procedures and osteotomies | Ear/Nose/Throat Services |          |      |
| 21143 | Orthognathic surgery procedures and osteotomies | Ear/Nose/Throat Services |          |      |
| 21145 | Orthognathic surgery procedures and osteotomies | Ear/Nose/Throat Services |          |      |
| 21146 | Orthognathic surgery procedures and osteotomies | Ear/Nose/Throat Services |          |      |
| 21147 | Orthognathic surgery procedures and osteotomies | Ear/Nose/Throat Services |          |      |
| 21150 | Orthognathic surgery procedures and osteotomies | Ear/Nose/Throat Services |          |      |
| 21154 | Orthognathic surgery procedures and osteotomies | Ear/Nose/Throat Services |          |      |
| 21193 | Orthognathic surgery procedures and osteotomies | Ear/Nose/Throat Services |          |      |
| 21195 | Orthognathic surgery procedures and osteotomies | Ear/Nose/Throat Services |          |      |
| 21196 | Orthognathic surgery procedures and osteotomies | Ear/Nose/Throat Services |          |      |
| 21198 | Orthognathic surgery procedures and osteotomies | Ear/Nose/Throat Services | 50278    | 42   |
| 21199 | Orthognathic surgery procedures and osteotomies | Ear/Nose/Throat Services |          |      |
| 21206 | Orthognathic surgery procedures and osteotomies | Ear/Nose/Throat Services |          |      |
| 21208 | Orthognathic surgery procedures and osteotomies | Ear/Nose/Throat Services | 508097   | 457  |
| 21209 | Orthognathic surgery procedures and osteotomies | Ear/Nose/Throat Services | 22589    | 25   |
| 21210 | Orthognathic surgery procedures and osteotomies | Ear/Nose/Throat Services | 1596960  | 696  |
| 21215 | Orthognathic surgery procedures and osteotomies | Ear/Nose/Throat Services | 2757845  | 644  |
| 21240 | Surgical Management of TMJ                      | Ear/Nose/Throat Services | 169158   | 41   |
| 21242 | Surgical Management of TMJ                      | Ear/Nose/Throat Services |          |      |
| 21243 | Surgical Management of TMJ                      | Ear/Nose/Throat Services |          |      |
| 21244 | Surgical Management of TMJ                      | Ear/Nose/Throat Services | 108281   | 123  |
| 21245 | Dental implants                                 | Ear/Nose/Throat Services |          |      |
| 21246 | Dental implants                                 | Ear/Nose/Throat Services |          |      |
| 21248 | Dental implants                                 | Ear/Nose/Throat Services | 151748   | 86   |
| 21249 | Dental implants                                 | Ear/Nose/Throat Services | 60415    | 22   |
| 21480 | Surgical Management of TMJ                      | Ear/Nose/Throat Services | 44506    | 240  |
| 21485 | Surgical Management of TMJ                      | Ear/Nose/Throat Services |          |      |
| 21490 | Surgical Management of TMJ                      | Ear/Nose/Throat Services |          |      |
| 21497 | Surgical Management of TMJ                      | Ear/Nose/Throat Services |          |      |
| 22532 | Spinal Fusion                                   | Musculoskeletal Services | 71209    | 61   |
| 22533 | Spinal Fusion                                   | Musculoskeletal Services | 324279   | 200  |
| 22534 | Spinal Fusion                                   | Musculoskeletal Services | 56671    | 109  |
| 22551 | Spinal Fusion                                   | Musculoskeletal Services | 35629292 | 7436 |
| 22552 | Spinal Fusion                                   | Musculoskeletal Services | 2931257  | 4471 |
| 22554 | Spinal Fusion                                   | Musculoskeletal Services | 2150054  | 1097 |
| 22556 | Spinal Fusion                                   | Musculoskeletal Services | 137561   | 106  |
| 22558 | Spinal Fusion                                   | Musculoskeletal Services | 4816008  | 3459 |
| 22585 | Spinal Fusion                                   | Musculoskeletal Services | 1174459  | 2258 |
| 22610 | Spinal Fusion                                   | Musculoskeletal Services | 1290611  | 1386 |
| 22612 | Spinal Fusion                                   | Musculoskeletal Services | 19219603 | 8716 |
| 22614 | Spinal Fusion                                   | Musculoskeletal Services | 11225086 | 9725 |
| 22630 | Spinal Fusion                                   | Musculoskeletal Services | 2000934  | 1224 |
| 22632 | Spinal Fusion                                   | Musculoskeletal Services | 160911   | 357  |

|       |                                                |                          |          |       |
|-------|------------------------------------------------|--------------------------|----------|-------|
| 22633 | Spinal Fusion                                  | Musculoskeletal Services | 14121631 | 7038  |
| 22634 | Spinal Fusion                                  | Musculoskeletal Services | 1499772  | 2139  |
| 22840 | Spinal Fusion                                  | Musculoskeletal Services | 6528610  | 7780  |
| 22842 | Spinal Fusion                                  | Musculoskeletal Services | 8703644  | 9992  |
| 22843 | Spinal Fusion                                  | Musculoskeletal Services | 1380280  | 1530  |
| 22844 | Spinal Fusion                                  | Musculoskeletal Services | 202263   | 181   |
| 22845 | Spinal Fusion                                  | Musculoskeletal Services | 5263695  | 6551  |
| 22846 | Spinal Fusion                                  | Musculoskeletal Services | 1465267  | 1751  |
| 22847 | Spinal Fusion                                  | Musculoskeletal Services |          |       |
| 22848 | Spinal Fusion                                  | Musculoskeletal Services | 386086   | 953   |
| 22853 | Spinal Fusion                                  | Musculoskeletal Services | 6993738  | 15582 |
| 22854 | Spinal Fusion                                  | Musculoskeletal Services | 546399   | 1021  |
| 22856 | Artificial Disc Surgery: Cervical              | Musculoskeletal Services | 2111797  | 212   |
| 22858 | Artificial Disc Surgery: Cervical              | Musculoskeletal Services | 45412    | 81    |
| 22859 | Spinal Fusion                                  | Musculoskeletal Services | 219205   | 416   |
| 22861 | Artificial Disc Surgery: Cervical              | Musculoskeletal Services |          |       |
| 27090 | Hip Arthroplasty                               | Musculoskeletal Services | 46939    | 78    |
| 27091 | Hip Arthroplasty                               | Musculoskeletal Services | 672117   | 420   |
| 27096 | Pain Management                                | Musculoskeletal Services | 9125219  | 62207 |
| 27125 | Hip Arthroplasty                               | Musculoskeletal Services | 2126874  | 1880  |
| 27130 | Hip Arthroplasty                               | Musculoskeletal Services | 44939304 | 29856 |
| 27132 | Hip Arthroplasty                               | Musculoskeletal Services | 2147627  | 1214  |
| 27134 | Hip Arthroplasty                               | Musculoskeletal Services | 4236705  | 2190  |
| 27137 | Hip Arthroplasty                               | Musculoskeletal Services | 1173343  | 796   |
| 27138 | Hip Arthroplasty                               | Musculoskeletal Services | 1252724  | 842   |
| 27412 | Autologous Chondrocyte Implantation (Carticel) | Musculoskeletal Services |          |       |
| 27415 | Osteochondral Allograft/Knee                   | Musculoskeletal Services |          |       |
| 27437 | Knee Arthrotomy                                | Musculoskeletal Services | 115104   | 177   |
| 27438 | Knee Arthrotomy                                | Musculoskeletal Services | 681844   | 227   |
| 27440 | Knee Arthrotomy                                | Musculoskeletal Services |          |       |
| 27441 | Knee Arthrotomy                                | Musculoskeletal Services |          |       |
| 27442 | Knee Arthrotomy                                | Musculoskeletal Services | 840939   | 114   |
| 27443 | Knee Arthrotomy                                | Musculoskeletal Services | 49195    | 22    |
| 27445 | Knee Arthroplasty                              | Musculoskeletal Services | 59395    | 51    |
| 27446 | Knee Arthroplasty                              | Musculoskeletal Services | 22565220 | 3125  |
| 27447 | Knee Arthroplasty                              | Musculoskeletal Services | 86523184 | 57352 |
| 27486 | Knee Arthroplasty                              | Musculoskeletal Services | 2950935  | 2103  |
| 27487 | Knee Arthroplasty                              | Musculoskeletal Services | 5785259  | 3103  |
| 27488 | Knee Arthrotomy                                | Musculoskeletal Services | 1126299  | 930   |
| 29800 | Surgical Management of TMJ                     | Ear/Nose/Throat Services |          |       |
| 29804 | Surgical Management of TMJ                     | Ear/Nose/Throat Services | 79735    | 32    |
| 29914 | Hip surgery to repair impingement syndrome     | Musculoskeletal Services | 230156   | 167   |
| 29915 | Hip surgery to repair impingement syndrome     | Musculoskeletal Services | 466853   | 107   |
| 32851 | Lung Transplant                                | Other Services           | 178542   | 48    |
| 32852 | Lung Transplant                                | Other Services           |          |       |
| 32853 | Lung Transplant                                | Other Services           | 192819   | 39    |
| 32854 | Lung Transplant                                | Other Services           | 269575   | 48    |
| 32855 | Lung Transplant                                | Other Services           | 9468     | 54    |

|       |                                 |                   |           |       |
|-------|---------------------------------|-------------------|-----------|-------|
| 32856 | Lung Transplant                 | Other Services    | 16049     | 76    |
| 33206 | Pacemaker/Defibrillator         | Cardiac Services  | 1415330   | 247   |
| 33207 | Pacemaker/Defibrillator         | Cardiac Services  | 15805507  | 3360  |
| 33208 | Pacemaker/Defibrillator         | Cardiac Services  | 92535338  | 20635 |
| 33212 | Pacemaker/Defibrillator         | Cardiac Services  | 161824    | 113   |
| 33213 | Pacemaker/Defibrillator         | Cardiac Services  | 1066221   | 399   |
| 33214 | Pacemaker/Defibrillator         | Cardiac Services  | 453886    | 104   |
| 33221 | Pacemaker/Defibrillator         | Cardiac Services  | 993894    | 90    |
| 33224 | Pacemaker/Defibrillator         | Cardiac Services  | 1428688   | 339   |
| 33225 | Pacemaker/Defibrillator         | Cardiac Services  | 4653128   | 6929  |
| 33227 | Pacemaker/Defibrillator         | Cardiac Services  | 7299401   | 1208  |
| 33228 | Pacemaker/Defibrillator         | Cardiac Services  | 59641063  | 7168  |
| 33229 | Pacemaker/Defibrillator         | Cardiac Services  | 14662821  | 1200  |
| 33230 | Pacemaker/Defibrillator         | Cardiac Services  | 526969    | 55    |
| 33231 | Pacemaker/Defibrillator         | Cardiac Services  | 680571    | 59    |
| 33240 | Pacemaker/Defibrillator         | Cardiac Services  | 434318    | 115   |
| 33249 | Pacemaker/Defibrillator         | Cardiac Services  | 176404351 | 9304  |
| 33262 | Pacemaker/Defibrillator         | Cardiac Services  | 14483264  | 817   |
| 33263 | Pacemaker/Defibrillator         | Cardiac Services  | 47449564  | 2710  |
| 33264 | Pacemaker/Defibrillator         | Cardiac Services  | 85315262  | 3571  |
| 33270 | Pacemaker/Defibrillator         | Cardiac Services  | 5579809   | 281   |
| 33271 | Pacemaker/Defibrillator         | Cardiac Services  |           |       |
| 33272 | Pacemaker/Defibrillator         | Cardiac Services  | 26556     | 35    |
| 33273 | Pacemaker/Defibrillator         | Cardiac Services  |           |       |
| 33933 | Heart/lung transplant           | Cardiac Services  |           |       |
| 33935 | Heart/lung transplant           | Cardiac Services  |           |       |
| 33944 | Heart Transplant                | Cardiac Services  | 19763     | 97    |
| 33945 | Heart Transplant                | Cardiac Services  | 785936    | 145   |
| 33975 | Left Ventricular Assist Devices | Cardiac Services  | 51985     | 45    |
| 33976 | Left Ventricular Assist Devices | Cardiac Services  |           |       |
| 33977 | Left Ventricular Assist Devices | Cardiac Services  |           |       |
| 33978 | Left Ventricular Assist Devices | Cardiac Services  |           |       |
| 33979 | Left Ventricular Assist Devices | Cardiac Services  | 432313    | 222   |
| 33980 | Left Ventricular Assist Devices | Cardiac Services  | 81792     | 68    |
| 33982 | Left Ventricular Assist Devices | Cardiac Services  |           |       |
| 33983 | Left Ventricular Assist Devices | Cardiac Services  | 98010     | 39    |
| 33990 | Left Ventricular Assist Devices | Cardiac Services  | 355050    | 1116  |
| 33991 | Left Ventricular Assist Devices | Cardiac Services  |           |       |
| 33992 | Left Ventricular Assist Devices | Cardiac Services  | 43354     | 251   |
| 33993 | Left Ventricular Assist Devices | Cardiac Services  | 14932     | 93    |
| 36475 | Venous ligation                 | Vascular Services | 38115020  | 23010 |
| 36476 | Venous ligation                 | Vascular Services | 548230    | 1896  |
| 36478 | Venous ligation                 | Vascular Services | 19465263  | 15040 |
| 36479 | Venous ligation                 | Vascular Services | 465980    | 1444  |
| 37500 | Venous ligation                 | Vascular Services |           |       |
| 37700 | Venous ligation                 | Vascular Services | 201840    | 159   |
| 37718 | Venous ligation                 | Vascular Services | 81254     | 46    |
| 37722 | Venous ligation                 | Vascular Services | 297785    | 142   |

|       |                              |                          |         |      |
|-------|------------------------------|--------------------------|---------|------|
| 37735 | Venous ligation              | Vascular Services        |         |      |
| 37760 | Venous ligation              | Vascular Services        |         |      |
| 37761 | Venous ligation              | Vascular Services        | 49827   | 88   |
| 37780 | Venous ligation              | Vascular Services        |         |      |
| 37785 | Venous ligation              | Vascular Services        | 160341  | 259  |
| 38204 | Bone Marrow Transplant       | Other Services           | 34747   | 56   |
| 38205 | Bone Marrow Transplant       | Other Services           | 4076    | 48   |
| 38206 | Bone Marrow Transplant       | Other Services           | 1021545 | 988  |
| 38207 | Bone Marrow Transplant       | Other Services           | 289553  | 786  |
| 38208 | Bone Marrow Transplant       | Other Services           | 25240   | 73   |
| 38209 | Bone Marrow Transplant       | Other Services           |         |      |
| 38210 | Bone Marrow Transplant       | Other Services           |         |      |
| 38211 | Bone Marrow Transplant       | Other Services           |         |      |
| 38212 | Bone Marrow Transplant       | Other Services           |         |      |
| 38213 | Bone Marrow Transplant       | Other Services           |         |      |
| 38214 | Bone Marrow Transplant       | Other Services           | 112720  | 324  |
| 38215 | Bone Marrow Transplant       | Other Services           | 32183   | 83   |
| 38230 | Bone Marrow Transplant       | Other Services           |         |      |
| 38232 | Bone Marrow Transplant       | Other Services           | 41444   | 42   |
| 38240 | Bone Marrow Transplant       | Other Services           | 129439  | 113  |
| 38241 | Bone Marrow Transplant       | Other Services           | 117136  | 369  |
| 38242 | Bone Marrow Transplant       | Other Services           | 32883   | 41   |
| 42140 | Uvulopalatopharyngoplasty    | Ear/Nose/Throat Services | 74824   | 73   |
| 42145 | Uvulopalatopharyngoplasty    | Ear/Nose/Throat Services | 490096  | 164  |
| 42299 | Uvulopalatopharyngoplasty    | Ear/Nose/Throat Services |         |      |
| 43631 | Gastroplasty, Gastric Bypass | Other Services           | 151918  | 114  |
| 43632 | Gastroplasty, Gastric Bypass | Other Services           | 514073  | 244  |
| 43633 | Gastroplasty, Gastric Bypass | Other Services           | 392268  | 196  |
| 43634 | Gastroplasty, Gastric Bypass | Other Services           |         |      |
| 43644 | Gastroplasty, Gastric Bypass | Other Services           | 1455153 | 786  |
| 43645 | Gastroplasty, Gastric Bypass | Other Services           | 73581   | 36   |
| 43659 | Gastroplasty, Gastric Bypass | Other Services           | 1046195 | 606  |
| 43770 | Gastroplasty, Gastric Bypass | Other Services           | 258545  | 41   |
| 43771 | Gastroplasty, Gastric Bypass | Other Services           |         |      |
| 43772 | Gastroplasty, Gastric Bypass | Other Services           | 19611   | 24   |
| 43773 | Gastroplasty, Gastric Bypass | Other Services           |         |      |
| 43774 | Gastroplasty, Gastric Bypass | Other Services           | 404859  | 421  |
| 43775 | Gastroplasty, Gastric Bypass | Other Services           | 2338625 | 2146 |
| 43845 | Gastroplasty, Gastric Bypass | Other Services           | 87373   | 42   |
| 43846 | Gastroplasty, Gastric Bypass | Other Services           |         |      |
| 43847 | Gastroplasty, Gastric Bypass | Other Services           |         |      |
| 43848 | Gastroplasty, Gastric Bypass | Other Services           | 53071   | 28   |
| 43886 | Gastroplasty, Gastric Bypass | Other Services           |         |      |
| 43887 | Gastroplasty, Gastric Bypass | Other Services           |         |      |
| 43888 | Gastroplasty, Gastric Bypass | Other Services           |         |      |
| 43999 | Gastroplasty, Gastric Bypass | Other Services           | 550249  | 2184 |
| 44135 | Intestinal transplant        | Other Services           |         |      |
| 44137 | Intestinal transplant        | Other Services           |         |      |

|       |                              |                          |          |        |
|-------|------------------------------|--------------------------|----------|--------|
| 44715 | Intestinal transplant        | Other Services           |          |        |
| 47135 | Liver Transplant             | Other Services           | 1877136  | 299    |
| 47142 | Liver Transplant             | Other Services           |          |        |
| 47143 | Liver Transplant             | Other Services           | 64092    | 263    |
| 47145 | Liver Transplant             | Other Services           |          |        |
| 47146 | Liver Transplant             | Other Services           |          |        |
| 47147 | Liver Transplant             | Other Services           | 8427     | 35     |
| 48551 | Pancreas transplant          | Other Services           | 11103    | 75     |
| 48552 | Pancreas transplant          | Other Services           |          |        |
| 48554 | Pancreas transplant          | Other Services           | 206131   | 74     |
| 48556 | Pancreas transplant          | Other Services           |          |        |
| 49999 | Gastroplasty, Gastric Bypass | Other Services           | 321989   | 507    |
| 50320 | Renal transplant             | Other Services           |          |        |
| 50323 | Renal transplant             | Other Services           | 195656   | 1594   |
| 50325 | Renal transplant             | Other Services           | 31619    | 307    |
| 50327 | Renal transplant             | Other Services           | 58501    | 487    |
| 50328 | Renal transplant             | Other Services           | 20706    | 190    |
| 50329 | Renal transplant             | Other Services           | 5617     | 55     |
| 50340 | Renal transplant             | Other Services           |          |        |
| 50360 | Renal transplant             | Other Services           | 5168095  | 2025   |
| 50365 | Renal transplant             | Other Services           | 74381    | 24     |
| 50380 | Renal transplant             | Other Services           |          |        |
| 55970 | Intersex Surgery             | Other Services           |          |        |
| 56805 | Intersex Surgery             | Other Services           |          |        |
| 57335 | Intersex Surgery             | Other Services           |          |        |
| 58321 | Infertility Services         | Other Services           |          |        |
| 58322 | Infertility Services         | Other Services           |          |        |
| 58323 | Infertility Services         | Other Services           |          |        |
| 58970 | Infertility Services         | Other Services           |          |        |
| 58974 | Infertility Services         | Other Services           |          |        |
| 62320 | Pain Management              | Musculoskeletal Services | 744291   | 2681   |
| 62321 | Pain Management              | Musculoskeletal Services | 16202399 | 42695  |
| 62322 | Pain Management              | Musculoskeletal Services | 3661933  | 14680  |
| 62323 | Pain Management              | Musculoskeletal Services | 57467216 | 147334 |
| 62324 | Pain Management              | Musculoskeletal Services | 489451   | 5000   |
| 62325 | Pain Management              | Musculoskeletal Services | 83996    | 378    |
| 62326 | Pain Management              | Musculoskeletal Services | 167458   | 1489   |
| 62327 | Pain Management              | Musculoskeletal Services | 201121   | 557    |
| 63001 | Laminectomy and Laminotomy   | Musculoskeletal Services | 290743   | 261    |
| 63003 | Laminectomy and Laminotomy   | Musculoskeletal Services | 190816   | 144    |
| 63005 | Laminectomy and Laminotomy   | Musculoskeletal Services | 1141681  | 476    |
| 63011 | Laminectomy and Laminotomy   | Musculoskeletal Services | 55016    | 63     |
| 63012 | Laminectomy and Laminotomy   | Musculoskeletal Services | 376753   | 434    |
| 63015 | Laminectomy and Laminotomy   | Musculoskeletal Services | 1131058  | 677    |
| 63016 | Laminectomy and Laminotomy   | Musculoskeletal Services | 107024   | 69     |
| 63017 | Laminectomy and Laminotomy   | Musculoskeletal Services | 448346   | 221    |
| 63020 | Laminectomy and Laminotomy   | Musculoskeletal Services | 1004462  | 340    |
| 63030 | Laminectomy and Laminotomy   | Musculoskeletal Services | 27277234 | 7105   |

|       |                                          |                          |           |        |
|-------|------------------------------------------|--------------------------|-----------|--------|
| 63035 | Laminectomy and Laminotomy               | Musculoskeletal Services | 1927345   | 1586   |
| 63040 | Laminectomy and Laminotomy               | Musculoskeletal Services | 137955    | 61     |
| 63042 | Laminectomy and Laminotomy               | Musculoskeletal Services | 4881237   | 2188   |
| 63043 | Laminectomy and Laminotomy               | Musculoskeletal Services | 18009     | 23     |
| 63044 | Laminectomy and Laminotomy               | Musculoskeletal Services | 446292    | 695    |
| 63045 | Laminectomy and Laminotomy               | Musculoskeletal Services | 3688418   | 2087   |
| 63046 | Laminectomy and Laminotomy               | Musculoskeletal Services | 1114241   | 738    |
| 63047 | Laminectomy and Laminotomy               | Musculoskeletal Services | 51065495  | 20935  |
| 63048 | Laminectomy and Laminotomy               | Musculoskeletal Services | 6351467   | 15594  |
| 63055 | Laminectomy and Laminotomy               | Musculoskeletal Services | 265826    | 142    |
| 63056 | Laminectomy and Laminotomy               | Musculoskeletal Services | 2750378   | 1308   |
| 63057 | Laminectomy and Laminotomy               | Musculoskeletal Services | 208811    | 396    |
| 63064 | Laminectomy and Laminotomy               | Musculoskeletal Services | 69265     | 39     |
| 63066 | Laminectomy and Laminotomy               | Musculoskeletal Services |           |        |
| 63075 | Laminectomy and Laminotomy               | Musculoskeletal Services | 420232    | 181    |
| 63076 | Laminectomy and Laminotomy               | Musculoskeletal Services | 40207     | 73     |
| 63077 | Laminectomy and Laminotomy               | Musculoskeletal Services | 24864     | 25     |
| 63078 | Laminectomy and Laminotomy               | Musculoskeletal Services |           |        |
| 63650 | Dorsal Column Neurostimulators           | Musculoskeletal Services | 48515218  | 9167   |
| 63655 | Dorsal Column Neurostimulators           | Musculoskeletal Services | 8579106   | 1733   |
| 63663 | Dorsal Column Neurostimulators           | Musculoskeletal Services | 1193490   | 393    |
| 63664 | Dorsal Column Neurostimulators           | Musculoskeletal Services | 1375769   | 193    |
| 63685 | Dorsal Column Neurostimulators           | Musculoskeletal Services | 121288595 | 5693   |
| 63688 | Dorsal Column Neurostimulators           | Musculoskeletal Services | 2444192   | 1627   |
| 64479 | Pain Management                          | Musculoskeletal Services | 3562722   | 7734   |
| 64480 | Pain Management                          | Musculoskeletal Services | 379291    | 3228   |
| 64483 | Pain Management                          | Musculoskeletal Services | 73533939  | 155443 |
| 64484 | Pain Management                          | Musculoskeletal Services | 5930279   | 71652  |
| 64490 | Pain Management                          | Musculoskeletal Services | 15452274  | 33225  |
| 64491 | Pain Management                          | Musculoskeletal Services | 3000072   | 29515  |
| 64492 | Pain Management                          | Musculoskeletal Services | 2069511   | 20294  |
| 64493 | Pain Management                          | Musculoskeletal Services | 51051176  | 104012 |
| 64494 | Pain Management                          | Musculoskeletal Services | 8977915   | 91952  |
| 64495 | Pain Management                          | Musculoskeletal Services | 5699776   | 56222  |
| 64510 | Pain Management                          | Musculoskeletal Services | 500207    | 1402   |
| 64520 | Pain Management                          | Musculoskeletal Services | 1520669   | 3955   |
| 64633 | Pain Management                          | Musculoskeletal Services | 11904999  | 12879  |
| 64634 | Pain Management                          | Musculoskeletal Services | 2776072   | 11732  |
| 64635 | Pain Management                          | Musculoskeletal Services | 51255236  | 51954  |
| 64636 | Pain Management                          | Musculoskeletal Services | 10265746  | 47265  |
| 67900 | Blepharoplasty, Canthopexy, Canthoplasty | Other Services           | 3109995   | 2146   |
| 67901 | Blepharoplasty, Canthopexy, Canthoplasty | Other Services           | 150305    | 102    |
| 67902 | Blepharoplasty, Canthopexy, Canthoplasty | Other Services           | 56921     | 23     |
| 67903 | Blepharoplasty, Canthopexy, Canthoplasty | Other Services           | 910586    | 682    |
| 67904 | Blepharoplasty, Canthopexy, Canthoplasty | Other Services           | 11268593  | 6411   |
| 67906 | Blepharoplasty, Canthopexy, Canthoplasty | Other Services           |           |        |
| 67908 | Blepharoplasty, Canthopexy, Canthoplasty | Other Services           | 1148562   | 844    |
| 67950 | Blepharoplasty, Canthopexy, Canthoplasty | Other Services           | 1397065   | 1398   |

|       |                                     |                          |          |        |
|-------|-------------------------------------|--------------------------|----------|--------|
| 69714 | Osseointegrated Implant             | Ear/Nose/Throat Services | 1923749  | 248    |
| 69930 | Cochlear Device and/or Implantation | Ear/Nose/Throat Services | 23254651 | 779    |
| 70336 | MRI                                 | Radiology Services       | 189534   | 558    |
| 70450 | CT Scans                            | Radiology Services       | 22139005 | 147354 |
| 70460 | CT Scans                            | Radiology Services       | 916359   | 3614   |
| 70470 | CT Scans                            | Radiology Services       | 4819603  | 15550  |
| 70480 | CT Scans                            | Radiology Services       | 1414736  | 7506   |
| 70481 | CT Scans                            | Radiology Services       | 351128   | 1160   |
| 70482 | CT Scans                            | Radiology Services       | 327108   | 1009   |
| 70486 | CT Scans                            | Radiology Services       | 8198115  | 51189  |
| 70487 | CT Scans                            | Radiology Services       | 579127   | 2062   |
| 70488 | CT Scans                            | Radiology Services       | 176028   | 608    |
| 70490 | CT Scans                            | Radiology Services       | 1660848  | 8243   |
| 70491 | CT Scans                            | Radiology Services       | 12639151 | 36929  |
| 70492 | CT Scans                            | Radiology Services       | 1288120  | 4106   |
| 70496 | CT Scans                            | Radiology Services       | 5996163  | 16717  |
| 70498 | CT Scans                            | Radiology Services       | 5539681  | 22274  |
| 70540 | MRI                                 | Radiology Services       | 624518   | 1893   |
| 70542 | MRI                                 | Radiology Services       | 71737    | 242    |
| 70543 | MRI                                 | Radiology Services       | 5749698  | 10544  |
| 70544 | MRI                                 | Radiology Services       | 7774623  | 25015  |
| 70545 | MRI                                 | Radiology Services       | 167410   | 471    |
| 70546 | MRI                                 | Radiology Services       | 1137797  | 2334   |
| 70547 | MRI                                 | Radiology Services       | 1501737  | 6658   |
| 70548 | MRI                                 | Radiology Services       | 489896   | 1808   |
| 70549 | MRI                                 | Radiology Services       | 2747635  | 6774   |
| 70551 | MRI                                 | Radiology Services       | 31359261 | 109966 |
| 70552 | MRI                                 | Radiology Services       | 1227941  | 3344   |
| 70553 | MRI                                 | Radiology Services       | 73390903 | 143451 |
| 70554 | MRI                                 | Radiology Services       | 29153    | 105    |
| 70555 | MRI                                 | Radiology Services       | 22134    | 60     |
| 71250 | CT Scans                            | Radiology Services       | 50255482 | 272118 |
| 71260 | CT Scans                            | Radiology Services       | 79654664 | 236286 |
| 71270 | CT Scans                            | Radiology Services       | 3527441  | 11571  |
| 71275 | CT Scans                            | Radiology Services       | 16977605 | 54131  |
| 71550 | MRI                                 | Radiology Services       | 274468   | 902    |
| 71551 | MRI                                 | Radiology Services       | 24234    | 56     |
| 71552 | MRI                                 | Radiology Services       | 680402   | 1179   |
| 71555 | MRI                                 | Radiology Services       | 303609   | 1577   |
| 72125 | CT Scans                            | Radiology Services       | 4793376  | 29742  |
| 72126 | CT Scans                            | Radiology Services       | 1131322  | 2952   |
| 72127 | CT Scans                            | Radiology Services       | 85939    | 310    |
| 72128 | CT Scans                            | Radiology Services       | 1712925  | 9037   |
| 72129 | CT Scans                            | Radiology Services       | 457658   | 1790   |
| 72130 | CT Scans                            | Radiology Services       | 50147    | 186    |
| 72131 | CT Scans                            | Radiology Services       | 7084828  | 40574  |
| 72132 | CT Scans                            | Radiology Services       | 2509591  | 7898   |
| 72133 | CT Scans                            | Radiology Services       | 191625   | 718    |

|       |          |                    |          |        |
|-------|----------|--------------------|----------|--------|
| 72141 | MRI      | Radiology Services | 29974782 | 100999 |
| 72142 | MRI      | Radiology Services | 177717   | 620    |
| 72146 | MRI      | Radiology Services | 9921518  | 33136  |
| 72147 | MRI      | Radiology Services | 127848   | 480    |
| 72148 | MRI      | Radiology Services | 64829382 | 238138 |
| 72149 | MRI      | Radiology Services | 356451   | 1083   |
| 72156 | MRI      | Radiology Services | 8249967  | 18006  |
| 72157 | MRI      | Radiology Services | 5743911  | 12615  |
| 72158 | MRI      | Radiology Services | 17909845 | 40553  |
| 72159 | MRI      | Radiology Services |          |        |
| 72191 | CT Scans | Radiology Services | 157148   | 449    |
| 72192 | CT Scans | Radiology Services | 1624530  | 9609   |
| 72193 | CT Scans | Radiology Services | 1095125  | 3794   |
| 72194 | CT Scans | Radiology Services | 264800   | 939    |
| 72195 | MRI      | Radiology Services | 4347595  | 13574  |
| 72196 | MRI      | Radiology Services | 222841   | 614    |
| 72197 | MRI      | Radiology Services | 16684749 | 29724  |
| 72198 | MRI      | Radiology Services | 127764   | 579    |
| 73200 | CT Scans | Radiology Services | 2379979  | 13249  |
| 73201 | CT Scans | Radiology Services | 663758   | 2431   |
| 73202 | CT Scans | Radiology Services | 71037    | 275    |
| 73206 | CT Scans | Radiology Services | 124955   | 380    |
| 73218 | MRI      | Radiology Services | 1826750  | 5630   |
| 73219 | MRI      | Radiology Services | 29499    | 83     |
| 73220 | MRI      | Radiology Services | 1390648  | 2626   |
| 73221 | MRI      | Radiology Services | 25086597 | 84580  |
| 73222 | MRI      | Radiology Services | 2230745  | 4048   |
| 73223 | MRI      | Radiology Services | 1418810  | 2864   |
| 73225 | MRI      | Radiology Services |          |        |
| 73700 | CT Scans | Radiology Services | 4639243  | 25565  |
| 73701 | CT Scans | Radiology Services | 609084   | 2351   |
| 73702 | CT Scans | Radiology Services | 161232   | 566    |
| 73706 | CT Scans | Radiology Services | 457921   | 1106   |
| 73718 | MRI      | Radiology Services | 6607311  | 20147  |
| 73719 | MRI      | Radiology Services | 64193    | 219    |
| 73720 | MRI      | Radiology Services | 3915863  | 7351   |
| 73721 | MRI      | Radiology Services | 35075599 | 118300 |
| 73722 | MRI      | Radiology Services | 771596   | 1463   |
| 73723 | MRI      | Radiology Services | 2129181  | 4261   |
| 73725 | MRI      | Radiology Services | 377592   | 902    |
| 74150 | CT Scans | Radiology Services | 2064953  | 13135  |
| 74160 | CT Scans | Radiology Services | 5285287  | 20814  |
| 74170 | CT Scans | Radiology Services | 6069350  | 20140  |
| 74174 | CT Scans | Radiology Services | 10204988 | 28332  |
| 74175 | CT Scans | Radiology Services | 1583260  | 5462   |
| 74176 | CT Scans | Radiology Services | 37664616 | 140557 |
| 74177 | CT Scans | Radiology Services | 84987678 | 266150 |
| 74178 | CT Scans | Radiology Services | 42621145 | 93883  |



|       |                      |                             |          |        |
|-------|----------------------|-----------------------------|----------|--------|
| 74181 | MRI                  | Radiology Services          | 3834237  | 12717  |
| 74182 | MRI                  | Radiology Services          | 329924   | 998    |
| 74183 | MRI                  | Radiology Services          | 26177639 | 50124  |
| 74185 | MRI                  | Radiology Services          | 533334   | 2084   |
| 74261 | CT Scans             | Radiology Services          | 436977   | 1959   |
| 74262 | CT Scans             | Radiology Services          | 52104    | 156    |
| 74712 | MRI                  | Radiology Services          |          |        |
| 75557 | MRI                  | Radiology Services          | 175922   | 543    |
| 75559 | MRI                  | Radiology Services          | 8603     | 37     |
| 75561 | MRI                  | Radiology Services          | 1811111  | 3532   |
| 75563 | MRI                  | Radiology Services          | 282396   | 432    |
| 75565 | MRI                  | Radiology Services          | 38112    | 1622   |
| 75571 | CT Scans             | Radiology Services          | 305131   | 3984   |
| 75572 | CT Scans             | Radiology Services          | 1464269  | 4912   |
| 75573 | CT Scans             | Radiology Services          | 39408    | 121    |
| 75574 | CT Scans             | Radiology Services          | 3546845  | 10410  |
| 75635 | CT Scans             | Radiology Services          | 5451447  | 14734  |
| 76380 | CT Scans             | Radiology Services          | 166281   | 1987   |
| 76948 | Infertility Services | Radiology Services          |          |        |
| 77014 | CT Scans             | Radiology Services          | 28874427 | 366123 |
| 77021 | MRI                  | Radiology Services          | 139206   | 565    |
| 77022 | MRI                  | Radiology Services          | 16256    | 75     |
| 77058 | MRI                  | Radiology Services          | 86674    | 317    |
| 77059 | MRI                  | Radiology Services          | 3909020  | 14381  |
| 77084 | MRI                  | Radiology Services          | 133515   | 404    |
| 77261 | Radiation Oncology   | Radiation Oncology Services | 94622    | 1230   |
| 77262 | Radiation Oncology   | Radiation Oncology Services | 62745    | 547    |
| 77263 | Radiation Oncology   | Radiation Oncology Services | 8252324  | 49313  |
| 77280 | Radiation Oncology   | Radiation Oncology Services | 13235649 | 57969  |
| 77285 | Radiation Oncology   | Radiation Oncology Services | 358587   | 897    |
| 77290 | Radiation Oncology   | Radiation Oncology Services | 17997940 | 42724  |
| 77293 | Radiation Oncology   | Radiation Oncology Services | 1359653  | 4969   |
| 77295 | Radiation Oncology   | Radiation Oncology Services | 27341992 | 27231  |
| 77299 | Radiation Oncology   | Radiation Oncology Services | 3360     | 28     |
| 77300 | Radiation Oncology   | Radiation Oncology Services | 27108376 | 68919  |
| 77301 | Radiation Oncology   | Radiation Oncology Services | 39043909 | 23821  |
| 77306 | Radiation Oncology   | Radiation Oncology Services | 364152   | 1079   |
| 77307 | Radiation Oncology   | Radiation Oncology Services | 3304714  | 8706   |
| 77316 | Radiation Oncology   | Radiation Oncology Services | 154533   | 937    |
| 77317 | Radiation Oncology   | Radiation Oncology Services | 190867   | 657    |
| 77318 | Radiation Oncology   | Radiation Oncology Services | 442153   | 1234   |
| 77321 | Radiation Oncology   | Radiation Oncology Services | 814592   | 3424   |
| 77331 | Radiation Oncology   | Radiation Oncology Services | 1233090  | 6849   |
| 77332 | Radiation Oncology   | Radiation Oncology Services | 1587656  | 15328  |
| 77333 | Radiation Oncology   | Radiation Oncology Services | 331785   | 2429   |
| 77334 | Radiation Oncology   | Radiation Oncology Services | 44854288 | 78564  |
| 77336 | Radiation Oncology   | Radiation Oncology Services | 21774762 | 206406 |
| 77338 | Radiation Oncology   | Radiation Oncology Services | 14234909 | 28323  |

|       |                          |                             |          |        |
|-------|--------------------------|-----------------------------|----------|--------|
| 77370 | Radiation Oncology       | Radiation Oncology Services | 1307922  | 10379  |
| 77371 | Radiation Oncology       | Radiation Oncology Services | 7259793  | 953    |
| 77372 | Radiation Oncology       | Radiation Oncology Services | 7562465  | 1123   |
| 77373 | Radiation Oncology       | Radiation Oncology Services | 41736424 | 24663  |
| 77385 | Radiation Oncology       | Radiation Oncology Services | 66560130 | 128931 |
| 77386 | Radiation Oncology       | Radiation Oncology Services | 99854308 | 191494 |
| 77387 | Radiation Oncology       | Radiation Oncology Services | 16902483 | 76378  |
| 77399 | Radiation Oncology       | Radiation Oncology Services | 118182   | 989    |
| 77401 | Radiation Oncology       | Radiation Oncology Services | 923737   | 30149  |
| 77402 | Radiation Oncology       | Radiation Oncology Services | 326344   | 2700   |
| 77407 | Radiation Oncology       | Radiation Oncology Services | 82077    | 683    |
| 77412 | Radiation Oncology       | Radiation Oncology Services | 60657397 | 279827 |
| 77417 | Radiation Oncology       | Radiation Oncology Services | 1634722  | 47284  |
| 77423 | Radiation Oncology       | Radiation Oncology Services |          |        |
| 77424 | Radiation Oncology       | Radiation Oncology Services | 1023413  | 148    |
| 77425 | Radiation Oncology       | Radiation Oncology Services | 192546   | 25     |
| 77427 | Radiation Oncology       | Radiation Oncology Services | 37489038 | 198651 |
| 77431 | Radiation Oncology       | Radiation Oncology Services | 81095    | 768    |
| 77432 | Radiation Oncology       | Radiation Oncology Services | 822820   | 1924   |
| 77435 | Radiation Oncology       | Radiation Oncology Services | 3670363  | 5682   |
| 77469 | Radiation Oncology       | Radiation Oncology Services | 55059    | 165    |
| 77470 | Radiation Oncology       | Radiation Oncology Services | 6837027  | 18109  |
| 77520 | Proton Beam Radiotherapy | Radiation Oncology Services | 329869   | 387    |
| 77522 | Proton Beam Radiotherapy | Radiation Oncology Services | 5919915  | 6219   |
| 77523 | Proton Beam Radiotherapy | Radiation Oncology Services | 14996081 | 14430  |
| 77525 | Proton Beam Radiotherapy | Radiation Oncology Services | 2578523  | 2306   |
| 77600 | Radiation Oncology       | Radiation Oncology Services | 343315   | 812    |
| 77605 | Radiation Oncology       | Radiation Oncology Services | 23926    | 28     |
| 77615 | Radiation Oncology       | Radiation Oncology Services |          |        |
| 77750 | Radiation Oncology       | Radiation Oncology Services | 50927    | 150    |
| 77761 | Radiation Oncology       | Radiation Oncology Services |          |        |
| 77762 | Radiation Oncology       | Radiation Oncology Services |          |        |
| 77763 | Radiation Oncology       | Radiation Oncology Services |          |        |
| 77767 | Radiation Oncology       | Radiation Oncology Services | 175509   | 724    |
| 77768 | Radiation Oncology       | Radiation Oncology Services | 492680   | 1480   |
| 77770 | Radiation Oncology       | Radiation Oncology Services | 2107146  | 2923   |
| 77771 | Radiation Oncology       | Radiation Oncology Services | 2908080  | 2725   |
| 77772 | Radiation Oncology       | Radiation Oncology Services | 490024   | 489    |
| 77778 | Radiation Oncology       | Radiation Oncology Services | 565957   | 899    |
| 77789 | Radiation Oncology       | Radiation Oncology Services | 5479     | 54     |
| 77790 | Radiation Oncology       | Radiation Oncology Services | 27111    | 246    |
| 77799 | Radiation Oncology       | Radiation Oncology Services | 2817     | 22     |
| 78012 | Nuclear Medicine         | Radiology Services          | 126918   | 701    |
| 78013 | Nuclear Medicine         | Radiology Services          | 125673   | 541    |
| 78014 | Nuclear Medicine         | Radiology Services          | 1499533  | 5757   |
| 78015 | Nuclear Medicine         | Radiology Services          | 2388     | 20     |
| 78016 | Nuclear Medicine         | Radiology Services          |          |        |
| 78018 | Nuclear Medicine         | Radiology Services          | 617218   | 1621   |

|       |                  |                    |           |        |
|-------|------------------|--------------------|-----------|--------|
| 78020 | Nuclear Medicine | Radiology Services | 11461     | 305    |
| 78070 | Nuclear Medicine | Radiology Services | 898099    | 2939   |
| 78071 | Nuclear Medicine | Radiology Services | 529148    | 1736   |
| 78072 | Nuclear Medicine | Radiology Services | 776074    | 1767   |
| 78075 | Nuclear Medicine | Radiology Services | 24701     | 25     |
| 78102 | Nuclear Medicine | Radiology Services | 57643     | 221    |
| 78103 | Nuclear Medicine | Radiology Services | 11253     | 36     |
| 78104 | Nuclear Medicine | Radiology Services | 13560     | 53     |
| 78185 | Nuclear Medicine | Radiology Services |           |        |
| 78195 | Nuclear Medicine | Radiology Services | 1328040   | 6007   |
| 78201 | Nuclear Medicine | Radiology Services | 153091    | 286    |
| 78202 | Nuclear Medicine | Radiology Services | 18938     | 41     |
| 78205 | Nuclear Medicine | Radiology Services | 572326    | 973    |
| 78206 | Nuclear Medicine | Radiology Services | 29851     | 84     |
| 78215 | Nuclear Medicine | Radiology Services | 136085    | 494    |
| 78216 | Nuclear Medicine | Radiology Services | 19985     | 84     |
| 78226 | Nuclear Medicine | Radiology Services | 1334616   | 5724   |
| 78227 | Nuclear Medicine | Radiology Services | 5028552   | 11674  |
| 78231 | Nuclear Medicine | Radiology Services |           |        |
| 78232 | Nuclear Medicine | Radiology Services |           |        |
| 78258 | Nuclear Medicine | Radiology Services | 15576     | 44     |
| 78261 | Nuclear Medicine | Radiology Services |           |        |
| 78262 | Nuclear Medicine | Radiology Services | 12414     | 35     |
| 78264 | Nuclear Medicine | Radiology Services | 3931210   | 10689  |
| 78265 | Nuclear Medicine | Radiology Services | 58753     | 305    |
| 78266 | Nuclear Medicine | Radiology Services | 26132     | 48     |
| 78278 | Nuclear Medicine | Radiology Services | 86105     | 435    |
| 78290 | Nuclear Medicine | Radiology Services | 15963     | 47     |
| 78291 | Nuclear Medicine | Radiology Services |           |        |
| 78300 | Nuclear Medicine | Radiology Services | 471938    | 1736   |
| 78305 | Nuclear Medicine | Radiology Services | 82760     | 355    |
| 78306 | Nuclear Medicine | Radiology Services | 17186183  | 49041  |
| 78315 | Nuclear Medicine | Radiology Services | 3736951   | 10192  |
| 78320 | Nuclear Medicine | Radiology Services | 1612164   | 4450   |
| 78414 | Nuclear Medicine | Radiology Services | 22079     | 69     |
| 78428 | Nuclear Medicine | Radiology Services | 4395      | 34     |
| 78445 | Nuclear Medicine | Radiology Services | 5314      | 25     |
| 78451 | Nuclear Medicine | Radiology Services | 4925018   | 7797   |
| 78452 | Nuclear Medicine | Radiology Services | 252665148 | 342790 |
| 78453 | Nuclear Medicine | Radiology Services | 92315     | 238    |
| 78454 | Nuclear Medicine | Radiology Services | 318659    | 1483   |
| 78457 | Nuclear Medicine | Radiology Services |           |        |
| 78458 | Nuclear Medicine | Radiology Services |           |        |
| 78459 | Nuclear Medicine | Radiology Services | 558729    | 417    |
| 78466 | Nuclear Medicine | Radiology Services | 21470     | 89     |
| 78468 | Nuclear Medicine | Radiology Services |           |        |
| 78469 | Nuclear Medicine | Radiology Services | 55185     | 108    |
| 78472 | Nuclear Medicine | Radiology Services | 1335068   | 4470   |

|       |                  |                    |           |        |
|-------|------------------|--------------------|-----------|--------|
| 78473 | Nuclear Medicine | Radiology Services | 102950    | 336    |
| 78481 | Nuclear Medicine | Radiology Services | 38775     | 199    |
| 78483 | Nuclear Medicine | Radiology Services | 15649     | 37     |
| 78491 | Nuclear Medicine | Radiology Services | 228891    | 191    |
| 78492 | Nuclear Medicine | Radiology Services | 34563477  | 25483  |
| 78494 | Nuclear Medicine | Radiology Services | 57589     | 220    |
| 78496 | Nuclear Medicine | Radiology Services | 11497     | 150    |
| 78579 | Nuclear Medicine | Radiology Services | 32595     | 120    |
| 78580 | Nuclear Medicine | Radiology Services | 181794    | 751    |
| 78582 | Nuclear Medicine | Radiology Services | 3181883   | 8882   |
| 78597 | Nuclear Medicine | Radiology Services | 91449     | 319    |
| 78598 | Nuclear Medicine | Radiology Services | 249585    | 676    |
| 78600 | Nuclear Medicine | Radiology Services |           |        |
| 78601 | Nuclear Medicine | Radiology Services |           |        |
| 78605 | Nuclear Medicine | Radiology Services |           |        |
| 78606 | Nuclear Medicine | Radiology Services |           |        |
| 78607 | Nuclear Medicine | Radiology Services | 2696185   | 2832   |
| 78608 | Nuclear Medicine | Radiology Services | 2422936   | 1941   |
| 78610 | Nuclear Medicine | Radiology Services |           |        |
| 78630 | Nuclear Medicine | Radiology Services | 111911    | 349    |
| 78635 | Nuclear Medicine | Radiology Services |           |        |
| 78645 | Nuclear Medicine | Radiology Services | 81406     | 181    |
| 78647 | Nuclear Medicine | Radiology Services |           |        |
| 78650 | Nuclear Medicine | Radiology Services |           |        |
| 78660 | Nuclear Medicine | Radiology Services | 10432     | 34     |
| 78700 | Nuclear Medicine | Radiology Services | 10469     | 56     |
| 78701 | Nuclear Medicine | Radiology Services | 28277     | 111    |
| 78707 | Nuclear Medicine | Radiology Services | 462591    | 1254   |
| 78708 | Nuclear Medicine | Radiology Services | 1373677   | 3665   |
| 78709 | Nuclear Medicine | Radiology Services | 265125    | 714    |
| 78710 | Nuclear Medicine | Radiology Services |           |        |
| 78725 | Nuclear Medicine | Radiology Services | 38402     | 256    |
| 78730 | Nuclear Medicine | Radiology Services |           |        |
| 78740 | Nuclear Medicine | Radiology Services |           |        |
| 78761 | Nuclear Medicine | Radiology Services |           |        |
| 78800 | Nuclear Medicine | Radiology Services | 96159     | 730    |
| 78801 | Nuclear Medicine | Radiology Services | 51638     | 200    |
| 78802 | Nuclear Medicine | Radiology Services | 453075    | 797    |
| 78803 | Nuclear Medicine | Radiology Services | 772520    | 2261   |
| 78804 | Nuclear Medicine | Radiology Services | 935966    | 1097   |
| 78805 | Nuclear Medicine | Radiology Services | 714756    | 971    |
| 78806 | Nuclear Medicine | Radiology Services | 659559    | 830    |
| 78807 | Nuclear Medicine | Radiology Services | 90246     | 266    |
| 78811 | Nuclear Medicine | Radiology Services | 95162     | 108    |
| 78812 | Nuclear Medicine | Radiology Services | 963800    | 913    |
| 78813 | Nuclear Medicine | Radiology Services | 304557    | 253    |
| 78814 | Nuclear Medicine | Radiology Services | 3484305   | 2648   |
| 78815 | Nuclear Medicine | Radiology Services | 152437267 | 112333 |

|       |                                 |                            |           |        |
|-------|---------------------------------|----------------------------|-----------|--------|
| 78816 | Nuclear Medicine                | Radiology Services         | 18159960  | 14055  |
| 81162 | BRCA Genetic Testing            | Other Services             | 9808639   | 3932   |
| 81211 | BRCA Genetic Testing            | Other Services             | 1713127   | 811    |
| 81212 | BRCA Genetic Testing            | Other Services             | 31256     | 176    |
| 81213 | BRCA Genetic Testing            | Other Services             | 183768    | 316    |
| 81214 | BRCA Genetic Testing            | Other Services             |           |        |
| 81215 | BRCA Genetic Testing            | Other Services             |           |        |
| 81217 | BRCA Genetic Testing            | Other Services             |           |        |
| 89250 | Infertility Services            | Other Services             |           |        |
| 89254 | Infertility Services            | Other Services             |           |        |
| 89255 | Infertility Services            | Other Services             |           |        |
| 89257 | Infertility Services            | Other Services             |           |        |
| 89258 | Infertility Services            | Other Services             |           |        |
| 89280 | Infertility Services            | Other Services             |           |        |
| 89342 | Infertility Services            | Other Services             |           |        |
| 90378 | Synagis                         | Other/Multispecialty Drugs | 0         | 0      |
| 91110 | Capsule Endoscopy               | Other Services             | 7359705   | 10830  |
| 91111 | Capsule Endoscopy               | Other Services             | 19287     | 44     |
| 92970 | Left Ventricular Assist Devices | Cardiac Services           |           |        |
| 93303 | Echocardiogram                  | Radiology Services         | 808970    | 2321   |
| 93304 | Echocardiogram                  | Radiology Services         | 81747     | 344    |
| 93306 | Echocardiogram                  | Radiology Services         | 287601708 | 932879 |
| 93307 | Echocardiogram                  | Radiology Services         | 1233557   | 4706   |
| 93308 | Echocardiogram                  | Radiology Services         | 3441578   | 25299  |
| 93350 | Echocardiogram                  | Radiology Services         | 7128938   | 21513  |
| 93351 | Echocardiogram                  | Radiology Services         | 15255983  | 48550  |
| 93451 | Cardiac Catheterization         | Cardiac Services           | 10889545  | 4606   |
| 93452 | Cardiac Catheterization         | Cardiac Services           | 789145    | 587    |
| 93453 | Cardiac Catheterization         | Cardiac Services           | 871775    | 486    |
| 93454 | Cardiac Catheterization         | Cardiac Services           | 25968437  | 13112  |
| 93455 | Cardiac Catheterization         | Cardiac Services           | 5922220   | 3208   |
| 93456 | Cardiac Catheterization         | Cardiac Services           | 6059335   | 2474   |
| 93457 | Cardiac Catheterization         | Cardiac Services           | 1072127   | 497    |
| 93458 | Cardiac Catheterization         | Cardiac Services           | 123551750 | 55081  |
| 93459 | Cardiac Catheterization         | Cardiac Services           | 22898436  | 11294  |
| 93460 | Cardiac Catheterization         | Cardiac Services           | 31235122  | 11866  |
| 93461 | Cardiac Catheterization         | Cardiac Services           | 4866098   | 2045   |
| 93530 | Cardiac Catheterization         | Cardiac Services           | 36714     | 25     |
| 93531 | Cardiac Catheterization         | Cardiac Services           | 155206    | 58     |
| 93532 | Cardiac Catheterization         | Cardiac Services           |           |        |
| 93533 | Cardiac Catheterization         | Cardiac Services           |           |        |
| 95782 | Sleep Studies                   | Sleep Medicine             |           |        |
| 95783 | Sleep Studies                   | Sleep Medicine             |           |        |
| 95805 | Sleep Studies                   | Sleep Medicine             | 468301    | 872    |
| 95807 | Sleep Studies                   | Sleep Medicine             | 442349    | 1130   |
| 95808 | Sleep Studies                   | Sleep Medicine             | 114529    | 177    |
| 95810 | Sleep Studies                   | Sleep Medicine             | 49151698  | 68380  |
| 95811 | Sleep Studies                   | Sleep Medicine             | 61500270  | 83293  |

|       |                                             |                             |          |       |
|-------|---------------------------------------------|-----------------------------|----------|-------|
| 99183 | Hyperbaric Oxygen Therapy                   | Other Services              | 10059526 | 87690 |
| A0430 | Air Ambulance                               | DME or Transport            | 12646737 | 2908  |
| A0435 | Air Ambulance                               | DME or Transport            | 6943936  | 2899  |
| A9606 | Xofigo                                      | Hematology/Oncology Drugs   | 37182829 | 2205  |
| C1767 | Dorsal Column Neurostimulators <sup>b</sup> | Musculoskeletal Services    | 17224308 | 1002  |
| C1816 | Dorsal Column Neurostimulators <sup>b</sup> | Musculoskeletal Services    |          |       |
| C1820 | Dorsal Column Neurostimulators <sup>b</sup> | Musculoskeletal Services    | 32806689 | 1830  |
| C1821 | Spinal Fusion                               | Musculoskeletal Services    | 904134   | 283   |
| C1822 | Dorsal Column Neurostimulators <sup>b</sup> | Musculoskeletal Services    | 6492777  | 511   |
| C8900 | MRI                                         | Radiology Services          | 91382    | 206   |
| C8901 | MRI                                         | Radiology Services          | 85580    | 230   |
| C8902 | MRI                                         | Radiology Services          | 402863   | 694   |
| C8903 | MRI                                         | Radiology Services          |          |       |
| C8904 | MRI                                         | Radiology Services          | 8294     | 34    |
| C8905 | MRI                                         | Radiology Services          | 71098    | 156   |
| C8906 | MRI                                         | Radiology Services          | 157909   | 355   |
| C8907 | MRI                                         | Radiology Services          | 117831   | 243   |
| C8908 | MRI                                         | Radiology Services          | 3622125  | 7933  |
| C8909 | MRI                                         | Radiology Services          | 132155   | 252   |
| C8910 | MRI                                         | Radiology Services          | 39081    | 158   |
| C8911 | MRI                                         | Radiology Services          | 331583   | 640   |
| C8912 | MRI                                         | Radiology Services          | 86952    | 133   |
| C8913 | MRI                                         | Radiology Services          | 20059    | 53    |
| C8914 | MRI                                         | Radiology Services          | 136837   | 219   |
| C8918 | MRI                                         | Radiology Services          | 23494    | 49    |
| C8919 | MRI                                         | Radiology Services          | 19246    | 40    |
| C8920 | MRI                                         | Radiology Services          | 115121   | 209   |
| C8932 | MRI                                         | Radiology Services          |          |       |
| C8933 | MRI                                         | Radiology Services          |          |       |
| C8934 | MRI                                         | Radiology Services          |          |       |
| C8935 | MRI                                         | Radiology Services          |          |       |
| C8936 | MRI                                         | Radiology Services          |          |       |
| C9399 | Unlisted (drugs\med inj)                    | Other/Multispecialty Drugs  | 44947804 | 5236  |
| C9483 | PD1\PDL1 Drugs                              | Hematology/Oncology Drugs   | 25303284 | 2837  |
| C9487 | Immunologic Agents                          | Other/Multispecialty Drugs  | 116783   | 27    |
| C9489 | Independent Drug                            | Neurology Drugs             |          |       |
| C9491 | PD1\PDL1 Drugs                              | Hematology/Oncology Drugs   | 276082   | 48    |
| C9492 | PD1\PDL1 Drugs                              | Hematology/Oncology Drugs   | 475942   | 83    |
| C9493 | Independent Drug                            | Neurology Drugs             | 342538   | 305   |
| C9494 | Multiple Sclerosis Drugs                    | Neurology Drugs             | 10175204 | 540   |
| C9741 | Cardiac Catheterization                     | Cardiac Services            | 7910237  | 266   |
| E0983 | Motorized wheelchair                        | DME or Transport            |          |       |
| E1007 | Motorized wheelchair                        | DME or Transport            | 16358898 | 2095  |
| G0259 | Pain Management                             | Musculoskeletal Services    | 55369    | 105   |
| G0260 | Pain Management                             | Musculoskeletal Services    | 13043937 | 31057 |
| G0277 | Hyperbaric Oxygen Therapy                   | Other Services              | 36223528 | 83485 |
| G0297 | CT Scans                                    | Radiology Services          | 4223374  | 28675 |
| G0339 | Radiation Oncology                          | Radiation Oncology Services | 1073686  | 368   |

|       |                                       |                             |           |        |
|-------|---------------------------------------|-----------------------------|-----------|--------|
| G0340 | Radiation Oncology                    | Radiation Oncology Services | 2690849   | 1162   |
| G6001 | Radiation Oncology                    | Radiation Oncology Services | 351933    | 7895   |
| G6002 | Radiation Oncology                    | Radiation Oncology Services | 10843547  | 250290 |
| G6003 | Radiation Oncology                    | Radiation Oncology Services | 11242     | 62     |
| G6004 | Radiation Oncology                    | Radiation Oncology Services | 77407     | 511    |
| G6005 | Radiation Oncology                    | Radiation Oncology Services | 78908     | 545    |
| G6006 | Radiation Oncology                    | Radiation Oncology Services | 8022      | 57     |
| G6007 | Radiation Oncology                    | Radiation Oncology Services | 31132     | 117    |
| G6008 | Radiation Oncology                    | Radiation Oncology Services | 31675     | 166    |
| G6009 | Radiation Oncology                    | Radiation Oncology Services | 16475     | 78     |
| G6010 | Radiation Oncology                    | Radiation Oncology Services |           |        |
| G6011 | Radiation Oncology                    | Radiation Oncology Services | 844180    | 2924   |
| G6012 | Radiation Oncology                    | Radiation Oncology Services | 19994124  | 74689  |
| G6013 | Radiation Oncology                    | Radiation Oncology Services | 12975188  | 49860  |
| G6014 | Radiation Oncology                    | Radiation Oncology Services | 1445745   | 5406   |
| G6015 | Radiation Oncology                    | Radiation Oncology Services | 83144822  | 237039 |
| G6016 | Radiation Oncology                    | Radiation Oncology Services | 579666    | 1647   |
| J0129 | Immunologic Agents                    | Rheumatology Drugs          | 142409704 | 40995  |
| J0135 | Immunologic Agents                    | Rheumatology Drugs          |           |        |
| J0178 | Ophthalmic medical injectables        | Other/Multispecialty Drugs  | 492855483 | 228976 |
| J0180 | Enzyme Replacement Drugs              | Other/Multispecialty Drugs  | 10186510  | 802    |
| J0202 | Multiple Sclerosis Drugs              | Neurology Drugs             | 10689514  | 555    |
| J0221 | Enzyme Replacement Drugs              | Other/Multispecialty Drugs  | 10511288  | 385    |
| J0256 | Alpha 1- Proteinase Inhibitor - Human | Hematology/Oncology Drugs   | 22910252  | 8845   |
| J0257 | Alpha 1- Proteinase Inhibitor - Human | Hematology/Oncology Drugs   | 1642545   | 808    |
| J0490 | Benlysta                              | Rheumatology Drugs          | 17885845  | 5175   |
| J0585 | Botulinum Toxin Type A                | Neurology Drugs             | 68819693  | 62097  |
| J0586 | Botulinum Toxin Type A                | Neurology Drugs             | 1563717   | 1284   |
| J0587 | Botulinum Toxin Type B                | Neurology Drugs             | 1591254   | 1728   |
| J0588 | Botulinum Toxin Type A                | Neurology Drugs             | 2651690   | 2998   |
| J0596 | Hereditary Angioedema Drugs           | Other/Multispecialty Drugs  | 46175     | 22     |
| J0597 | Hereditary Angioedema Drugs           | Other/Multispecialty Drugs  | 906097    | 122    |
| J0598 | Hereditary Angioedema Drugs           | Other/Multispecialty Drugs  | 258758    | 90     |
| J0630 | Osteoporosis Drugs                    | Other/Multispecialty Drugs  |           |        |
| J0638 | Ilaris                                | Rheumatology Drugs          |           |        |
| J0641 | Fusilev                               | Hematology/Oncology Drugs   | 3062984   | 6606   |
| J0717 | Immunologic Agents                    | Rheumatology Drugs          | 58207798  | 20394  |
| J0725 | Injectable Infertility Medications    | Other/Multispecialty Drugs  | 81703     | 1839   |
| J0800 | Acthar Gel                            | Rheumatology Drugs          |           |        |
| J0881 | Darbepoetin Alpha, Epoetin Alpha      | Hematology/Oncology Drugs   | 57648493  | 65947  |
| J0882 | Darbepoetin Alpha, Epoetin Alpha      | Hematology/Oncology Drugs   | 117516479 | 383886 |
| J0885 | Darbepoetin Alpha, Epoetin Alpha      | Hematology/Oncology Drugs   | 62465908  | 136007 |
| J0887 | Darbepoetin Alpha, Epoetin Alpha      | Hematology/Oncology Drugs   | 883910819 | 278998 |
| J0888 | Darbepoetin Alpha, Epoetin Alpha      | Hematology/Oncology Drugs   | 28100     | 47     |
| J0897 | Osteoporosis Drugs                    | Other/Multispecialty Drugs  | 254387079 | 193197 |
| J1290 | Hereditary Angioedema Drugs           | Other/Multispecialty Drugs  |           |        |
| J1300 | Soliris                               | Other/Multispecialty Drugs  | 50850053  | 2160   |
| J1325 | Pulmonary Arterial Hypertension Drugs | Cardiovascular Drugs        | 4203576   | 1555   |

|       |                                       |                            |           |        |
|-------|---------------------------------------|----------------------------|-----------|--------|
| J1438 | Immunologic Agents                    | Rheumatology Drugs         | 65280     | 71     |
| J1442 | Granulocyte-colony stimulating factor | Hematology/Oncology Drugs  | 12579491  | 29573  |
| J1447 | Granulocyte-colony stimulating factor | Hematology/Oncology Drugs  | 3630947   | 12983  |
| J1453 | Anti Emetics                          | Hematology/Oncology Drugs  | 18577766  | 63440  |
| J1459 | Immunoglobulins                       | Other/Multispecialty Drugs | 56456771  | 18317  |
| J1460 | Immunoglobulins                       | Other/Multispecialty Drugs | 47129     | 337    |
| J1556 | Immunoglobulins                       | Other/Multispecialty Drugs | 361650    | 118    |
| J1557 | Immunoglobulins                       | Other/Multispecialty Drugs | 7310297   | 2425   |
| J1559 | Immunoglobulins                       | Other/Multispecialty Drugs | 25560821  | 6557   |
| J1560 | Immunoglobulins                       | Other/Multispecialty Drugs | 14329     | 59     |
| J1561 | Immunoglobulins                       | Other/Multispecialty Drugs | 55366906  | 17953  |
| J1566 | Immunoglobulins                       | Other/Multispecialty Drugs | 13192909  | 5375   |
| J1568 | Immunoglobulins                       | Other/Multispecialty Drugs | 35559607  | 14041  |
| J1569 | Immunoglobulins                       | Other/Multispecialty Drugs | 71899772  | 23172  |
| J1572 | Immunoglobulins                       | Other/Multispecialty Drugs | 9680140   | 4018   |
| J1575 | Immunoglobulins                       | Other/Multispecialty Drugs | 8376608   | 1726   |
| J1595 | Multiple Sclerosis Drugs              | Neurology Drugs            | 43272     | 223    |
| J1599 | Immunoglobulins                       | Other/Multispecialty Drugs | 153385    | 32     |
| J1602 | Immunologic Agents                    | Other/Multispecialty Drugs | 44022940  | 10104  |
| J1725 | Makena                                | Other/Multispecialty Drugs | 34997     | 77     |
| J1744 | Hereditary Angioedema Drugs           | Other/Multispecialty Drugs |           |        |
| J1745 | Immunologic Agents                    | Other/Multispecialty Drugs | 276017565 | 64557  |
| J1786 | Enzyme Replacement Drugs              | Other/Multispecialty Drugs | 7827818   | 533    |
| J1826 | Multiple Sclerosis Drugs              | Neurology Drugs            | 14655     | 41     |
| J1931 | Enzyme Replacement Drugs              | Other/Multispecialty Drugs | 562812    | 44     |
| J2182 | Nucala                                | Other/Multispecialty Drugs | 11811440  | 4320   |
| J2323 | Multiple Sclerosis Drugs              | Neurology Drugs            | 63815888  | 11280  |
| J2357 | Respiratory Injectables               | Other/Multispecialty Drugs | 73599195  | 35323  |
| J2503 | Ophthalmic medical injectables        | Other/Multispecialty Drugs | 38197     | 43     |
| J2505 | Granulocyte-colony stimulating factor | Hematology/Oncology Drugs  | 278531137 | 65779  |
| J2507 | Krystexxa                             | Rheumatology Drugs         | 7299350   | 519    |
| J2778 | Ophthalmic medical injectables        | Other/Multispecialty Drugs | 208337337 | 103768 |
| J2786 | Respiratory Injectables               | Other/Multispecialty Drugs | 1484409   | 600    |
| J2820 | Granulocyte-colony stimulating factor | Hematology/Oncology Drugs  | 971249    | 2739   |
| J3060 | Enzyme Replacement Drugs              | Other/Multispecialty Drugs | 3032495   | 132    |
| J3110 | Osteoporosis Drugs                    | Other/Multispecialty Drugs | 381185    | 27     |
| J3262 | Immunologic Agents                    | Other/Multispecialty Drugs | 44529779  | 18897  |
| J3285 | Pulmonary Arterial Hypertension Drugs | Cardiovascular Drugs       | 34318848  | 1967   |
| J3357 | Immunologic Agents                    | Other/Multispecialty Drugs | 19027269  | 1704   |
| J3380 | Immunologic Agents                    | Other/Multispecialty Drugs | 38041643  | 7080   |
| J3385 | Enzyme Replacement Drugs              | Other/Multispecialty Drugs | 5043142   | 386    |
| J3490 | Unlisted (drugs\med inj)              | Other/Multispecialty Drugs | 22108890  | 243023 |
| J3590 | Unlisted (drugs\med inj)              | Other/Multispecialty Drugs | 19314115  | 47872  |
| J7175 | Blood Clotting Factor                 | Hematology/Oncology Drugs  |           |        |
| J7178 | Blood Clotting Factor                 | Hematology/Oncology Drugs  | 240278    | 45     |
| J7179 | Blood Clotting Factor                 | Hematology/Oncology Drugs  | 2171603   | 20     |
| J7180 | Blood Clotting Factor                 | Hematology/Oncology Drugs  |           |        |
| J7181 | Blood Clotting Factor                 | Hematology/Oncology Drugs  |           |        |



|       |                                       |                            |           |        |
|-------|---------------------------------------|----------------------------|-----------|--------|
| J7182 | Blood Clotting Factor                 | Hematology/Oncology Drugs  | 267041    | 46     |
| J7183 | Blood Clotting Factor                 | Hematology/Oncology Drugs  | 613524    | 34     |
| J7185 | Blood Clotting Factor                 | Hematology/Oncology Drugs  | 692970    | 27     |
| J7186 | Blood Clotting Factor                 | Hematology/Oncology Drugs  | 397116    | 51     |
| J7187 | Blood Clotting Factor                 | Hematology/Oncology Drugs  | 7605874   | 552    |
| J7189 | Blood Clotting Factor                 | Hematology/Oncology Drugs  | 2461235   | 40     |
| J7190 | Blood Clotting Factor                 | Hematology/Oncology Drugs  | 3663217   | 104    |
| J7192 | Blood Clotting Factor                 | Hematology/Oncology Drugs  | 37975490  | 1022   |
| J7193 | Blood Clotting Factor                 | Hematology/Oncology Drugs  | 1238022   | 47     |
| J7194 | Blood Clotting Factor                 | Hematology/Oncology Drugs  | 77366     | 21     |
| J7195 | Blood Clotting Factor                 | Hematology/Oncology Drugs  | 11823655  | 404    |
| J7196 | Blood Clotting Factor                 | Hematology/Oncology Drugs  |           |        |
| J7197 | Blood Clotting Factor                 | Hematology/Oncology Drugs  |           |        |
| J7198 | Blood Clotting Factor                 | Hematology/Oncology Drugs  | 8915207   | 121    |
| J7199 | Blood Clotting Factor                 | Hematology/Oncology Drugs  |           |        |
| J7200 | Blood Clotting Factor                 | Hematology/Oncology Drugs  | 1073855   | 33     |
| J7201 | Blood Clotting Factor                 | Hematology/Oncology Drugs  | 7899414   | 154    |
| J7202 | Blood Clotting Factor                 | Hematology/Oncology Drugs  | 1570621   | 49     |
| J7205 | Blood Clotting Factor                 | Hematology/Oncology Drugs  | 13976591  | 327    |
| J7207 | Blood Clotting Factor                 | Hematology/Oncology Drugs  | 5772779   | 78     |
| J7209 | Blood Clotting Factor                 | Hematology/Oncology Drugs  |           |        |
| J7320 | Viscosupplementation                  | Other/Multispecialty Drugs | 2959341   | 11991  |
| J7321 | Viscosupplementation                  | Other/Multispecialty Drugs | 12131156  | 108397 |
| J7322 | Viscosupplementation                  | Other/Multispecialty Drugs | 734189    | 1304   |
| J7323 | Viscosupplementation                  | Other/Multispecialty Drugs | 14092721  | 68012  |
| J7324 | Viscosupplementation                  | Other/Multispecialty Drugs | 15851161  | 79103  |
| J7325 | Viscosupplementation                  | Other/Multispecialty Drugs | 27008077  | 49374  |
| J7326 | Viscosupplementation                  | Other/Multispecialty Drugs | 5188136   | 7217   |
| J7327 | Viscosupplementation                  | Other/Multispecialty Drugs | 11266545  | 9982   |
| J7328 | Viscosupplementation                  | Other/Multispecialty Drugs | 3914172   | 8601   |
| J7686 | Pulmonary Arterial Hypertension Drugs | Cardiovascular Drugs       | 38294804  | 2558   |
| J7799 | Unlisted (drugs\med inj)              | Other/Multispecialty Drugs | 7552650   | 2271   |
| J8499 | Unlisted (drugs\med inj)              | Other/Multispecialty Drugs | 43151     | 86     |
| J8521 | Xeloda                                | Hematology/Oncology Drugs  | 1001      | 24     |
| J9042 | Adcetris                              | Rheumatology Drugs         | 18163612  | 1030   |
| J9055 | Erbitux                               | Hematology/Oncology Drugs  | 38818457  | 12095  |
| J9145 | Darzalex                              | Hematology/Oncology Drugs  | 86620809  | 14619  |
| J9176 | Empliciti                             | Hematology/Oncology Drugs  | 15633439  | 3152   |
| J9228 | Yervoy                                | Hematology/Oncology Drugs  | 47856604  | 1213   |
| J9271 | PD1\PDL1 Drugs                        | Hematology/Oncology Drugs  | 205136894 | 22591  |
| J9299 | PD1\PDL1 Drugs                        | Hematology/Oncology Drugs  | 294218826 | 48614  |
| J9301 | Gazyva                                | Hematology/Oncology Drugs  | 16232601  | 3112   |
| J9303 | Vectibix                              | Hematology/Oncology Drugs  | 16206017  | 3249   |
| J9306 | HER2 Receptor Targeted Drugs          | Hematology/Oncology Drugs  | 44454615  | 9026   |
| J9308 | Cyramza                               | Hematology/Oncology Drugs  | 19948067  | 2817   |
| J9310 | Immunologic Agents                    | Other/Multispecialty Drugs | 350445763 | 53811  |
| J9325 | Imlygic                               | Hematology/Oncology Drugs  | 2740532   | 343    |
| J9354 | HER2 Receptor Targeted Drugs          | Hematology/Oncology Drugs  | 23020501  | 2945   |

|       |                                     |                            |           |       |
|-------|-------------------------------------|----------------------------|-----------|-------|
| J9355 | HER2 Receptor Targeted Drugs        | Hematology/Oncology Drugs  | 153005551 | 39049 |
| J9400 | Zaltrap                             | Hematology/Oncology Drugs  | 713283    | 255   |
| J9999 | Unlisted (drugs\med inj)            | Other/Multispecialty Drugs | 20168149  | 3659  |
| K0010 | Motorized wheelchair                | DME or Transport           |           |       |
| K0011 | Motorized wheelchair                | DME or Transport           |           |       |
| K0800 | Motorized wheelchair                | DME or Transport           | 841235    | 2488  |
| K0801 | Motorized wheelchair                | DME or Transport           | 153097    | 256   |
| K0802 | Motorized wheelchair                | DME or Transport           |           |       |
| K0806 | Motorized wheelchair                | DME or Transport           |           |       |
| K0814 | Motorized wheelchair                | DME or Transport           | 7786      | 43    |
| K0815 | Motorized wheelchair                | DME or Transport           | 6635      | 37    |
| K0816 | Motorized wheelchair                | DME or Transport           | 639927    | 4027  |
| K0820 | Motorized wheelchair                | DME or Transport           |           |       |
| K0821 | Motorized wheelchair                | DME or Transport           | 515717    | 2885  |
| K0822 | Motorized wheelchair                | DME or Transport           | 567545    | 3580  |
| K0823 | Motorized wheelchair                | DME or Transport           | 6065890   | 39500 |
| K0824 | Motorized wheelchair                | DME or Transport           | 132199    | 577   |
| K0825 | Motorized wheelchair                | DME or Transport           | 1678692   | 7720  |
| K0826 | Motorized wheelchair                | DME or Transport           | 14075     | 36    |
| K0827 | Motorized wheelchair                | DME or Transport           | 224502    | 622   |
| K0828 | Motorized wheelchair                | DME or Transport           |           |       |
| K0829 | Motorized wheelchair                | DME or Transport           |           |       |
| K0835 | Motorized wheelchair                | DME or Transport           | 469281    | 274   |
| K0836 | Motorized wheelchair                | DME or Transport           | 141573    | 61    |
| K0837 | Motorized wheelchair                | DME or Transport           | 84694     | 33    |
| K0838 | Motorized wheelchair                | DME or Transport           |           |       |
| K0839 | Motorized wheelchair                | DME or Transport           |           |       |
| K0841 | Motorized wheelchair                | DME or Transport           | 221168    | 88    |
| K0842 | Motorized wheelchair                | DME or Transport           | 145738    | 64    |
| K0843 | Motorized wheelchair                | DME or Transport           | 89463     | 33    |
| K0848 | Motorized wheelchair                | DME or Transport           | 703374    | 149   |
| K0849 | Motorized wheelchair                | DME or Transport           | 721598    | 164   |
| K0850 | Motorized wheelchair                | DME or Transport           |           |       |
| K0851 | Motorized wheelchair                | DME or Transport           |           |       |
| K0852 | Motorized wheelchair                | DME or Transport           |           |       |
| K0856 | Motorized wheelchair                | DME or Transport           | 3899804   | 757   |
| K0857 | Motorized wheelchair                | DME or Transport           |           |       |
| K0858 | Motorized wheelchair                | DME or Transport           | 238977    | 40    |
| K0859 | Motorized wheelchair                | DME or Transport           |           |       |
| K0860 | Motorized wheelchair                | DME or Transport           |           |       |
| K0861 | Motorized wheelchair                | DME or Transport           | 10772023  | 2029  |
| K0862 | Motorized wheelchair                | DME or Transport           | 729102    | 108   |
| K0863 | Motorized wheelchair                | DME or Transport           |           |       |
| L5856 | Lower Limb Prosthetics              | DME or Transport           | 7252079   | 313   |
| L5858 | Lower Limb Prosthetics              | DME or Transport           | 568695    | 31    |
| L5859 | Lower Limb Prosthetics              | DME or Transport           |           |       |
| L5987 | Lower Limb Prosthetics              | DME or Transport           | 4609475   | 623   |
| L5999 | Lower Limb Prosthetics              | DME or Transport           | 124907    | 126   |
| L8614 | Cochlear Device and/or Implantation | Ear/Nose/Throat Services   | 14357434  | 628   |

|       |                                       |                            |           |         |
|-------|---------------------------------------|----------------------------|-----------|---------|
| L8619 | Cochlear Device and/or Implantation   | Ear/Nose/Throat Services   | 5484867   | 643     |
| L8690 | Osseointegrated Implant               | Ear/Nose/Throat Services   | 1028334   | 201     |
| L8691 | Osseointegrated Implant               | Ear/Nose/Throat Services   | 738486    | 284     |
| L8693 | Osseointegrated Implant               | Ear/Nose/Throat Services   |           |         |
| Q2043 | Provenge                              | Hematology/Oncology Drugs  | 39511583  | 1006    |
| Q3027 | Multiple Sclerosis Drugs              | Neurology Drugs            | 681701    | 599     |
| Q4074 | Pulmonary Arterial Hypertension Drugs | Cardiovascular Drugs       | 3821526   | 170     |
| Q4081 | Darbepoetin Alpha, Epoetin Alpha      | Hematology/Oncology Drugs  | 558056882 | 2036194 |
| Q5101 | Granulocyte-colony stimulating factor | Hematology/Oncology Drugs  | 7519213   | 23864   |
| Q5102 | Immunologic Agents                    | Other/Multispecialty Drugs | 7334833   | 1929    |
| Q9986 | Independent Drug                      | Other/Multispecialty Drugs | 10643     | 36      |
| Q9989 | Immunologic Agents                    | Other/Multispecialty Drugs | 580999    | 125     |

<sup>a</sup> Per Center for Medicare and Medicaid Services cell size suppression policy, cells are suppressed if the annual count is 10 or less and are counter-suppressed if the count is between 10 and 20.

<sup>b</sup> Per prior authorization rules, claim lines C-codes for dorsal column neurostimulators were only included in the analysis if accompanied in the claim by another neurostimulator procedure code that was not a C-code.

| <b>eTable2: Clinician Annual Risk of PA Service, by Specialty</b> |                        |                            |               |   |       |
|-------------------------------------------------------------------|------------------------|----------------------------|---------------|---|-------|
| <b>Clinician Specialty<sup>a</sup></b>                            | <b>Clinician Count</b> | <b>% with a PA Service</b> | <b>95% CI</b> |   |       |
| Addiction medicine                                                | 231                    | 8.7%                       | 5.0%          | - | 12.3% |
| Allergy/immunology                                                | 3870                   | 44.4%                      | 42.9%         | - | 46.0% |
| Anesthesiology                                                    | 40854                  | 23.7%                      | 23.3%         | - | 24.1% |
| Cardiac Electrophysiology                                         | 1187                   | 97.1%                      | 96.2%         | - | 98.1% |
| Cardiac surgery                                                   | 819                    | 69.2%                      | 66.1%         | - | 72.4% |
| Cardiology                                                        | 22903                  | 92.6%                      | 92.2%         | - | 92.9% |
| Colorectal surgery                                                | 884                    | 60.7%                      | 57.5%         | - | 64.0% |
| Critical care (intensivists)                                      | 3081                   | 25.8%                      | 24.3%         | - | 27.4% |
| Dermatology                                                       | 12247                  | 12.4%                      | 11.9%         | - | 13.0% |
| Diagnostic radiology                                              | 31232                  | 91.1%                      | 90.8%         | - | 91.4% |
| Emergency medicine                                                | 39911                  | 50.1%                      | 49.6%         | - | 50.5% |
| Endocrinology                                                     | 4228                   | 60.4%                      | 58.9%         | - | 61.9% |
| Gastroenterology                                                  | 14653                  | 76.9%                      | 76.3%         | - | 77.6% |
| General practice                                                  | 245750                 | 58.5%                      | 58.3%         | - | 58.7% |
| General surgery                                                   | 25916                  | 70.0%                      | 69.4%         | - | 70.6% |
| Geriatric psychiatry                                              | 172                    | 11.0%                      | 6.4%          | - | 15.7% |
| Geriatric medicine                                                | 1271                   | 42.6%                      | 39.9%         | - | 45.4% |
| Gynecologist/oncologist                                           | 415                    | 74.0%                      | 69.8%         | - | 78.2% |
| Hand surgery                                                      | 960                    | 61.3%                      | 58.2%         | - | 64.3% |
| Hematology/oncology                                               | 8150                   | 87.8%                      | 87.1%         | - | 88.5% |
| Hospice and Palliative Care                                       | 1067                   | 12.0%                      | 10.0%         | - | 13.9% |
| Infectious disease                                                | 4467                   | 33.4%                      | 32.0%         | - | 34.8% |
| Interventional Pain Management                                    | 1769                   | 90.9%                      | 89.6%         | - | 92.2% |
| Interventional cardiology                                         | 3316                   | 98.6%                      | 98.2%         | - | 99.0% |
| Interventional radiology                                          | 1306                   | 83.2%                      | 81.2%         | - | 85.3% |
| Maxillofacial surgery                                             | 923                    | 21.8%                      | 19.1%         | - | 24.4% |
| Nephrology                                                        | 3468                   | 73.6%                      | 72.1%         | - | 75.1% |
| Neurology                                                         | 15574                  | 69.9%                      | 69.2%         | - | 70.6% |
| Neuropsychiatry                                                   | 98                     | 31.6%                      | 22.4%         | - | 40.8% |
| Neurosurgery                                                      | 4945                   | 89.6%                      | 88.8%         | - | 90.5% |
| Nuclear medicine                                                  | 574                    | 93.9%                      | 91.9%         | - | 95.9% |
| Obstetrics/gynecology                                             | 33611                  | 18.7%                      | 18.3%         | - | 19.2% |
| Ophthalmology                                                     | 18361                  | 43.6%                      | 42.9%         | - | 44.4% |
| Orthopedic surgery                                                | 23674                  | 85.0%                      | 84.5%         | - | 85.4% |
| Osteopathic manipulative therapy                                  | 787                    | 39.5%                      | 36.1%         | - | 42.9% |
| Otolaryngology                                                    | 9587                   | 74.0%                      | 73.1%         | - | 74.8% |
| Pain Management                                                   | 1653                   | 89.1%                      | 87.6%         | - | 90.6% |
| Pathology                                                         | 12238                  | 2.4%                       | 2.1%          | - | 2.7%  |
| Pediatric medicine                                                | 6056                   | 19.3%                      | 18.3%         | - | 20.3% |
| Physical medicine and rehabilitation                              | 8171                   | 54.3%                      | 53.2%         | - | 55.4% |
| Plastic and reconstructive surgery                                | 4554                   | 52.5%                      | 51.1%         | - | 54.0% |
| Preventive medicine                                               | 442                    | 18.8%                      | 15.1%         | - | 22.4% |
| Psychiatry                                                        | 27086                  | 3.5%                       | 3.3%          | - | 3.7%  |
| Pulmonary disease                                                 | 8806                   | 77.8%                      | 76.9%         | - | 78.6% |
| Radiation oncology                                                | 4654                   | 97.4%                      | 97.0%         | - | 97.9% |

|                   |      |       |       |   |       |
|-------------------|------|-------|-------|---|-------|
| Rheumatology      | 3420 | 85.1% | 83.9% | - | 86.3% |
| Sleep medicine    | 754  | 90.2% | 88.1% | - | 92.3% |
| Sports medicine   | 833  | 80.9% | 78.2% | - | 83.6% |
| Surgical oncology | 339  | 72.6% | 67.8% | - | 77.3% |
| Thoracic surgery  | 2113 | 75.1% | 73.2% | - | 76.9% |
| Urology           | 9598 | 84.2% | 83.5% | - | 84.9% |
| Vascular surgery  | 2392 | 81.7% | 80.1% | - | 83.2% |

<sup>a</sup> Table includes all physician specialties encompassing >0.01% of clinicians in sample. General practice includes clinicians in family practice, internal medicine, and hospital medicine.

**eFigure: Projected Savings From Prior Authorization in Fee-For-Service Medicare**

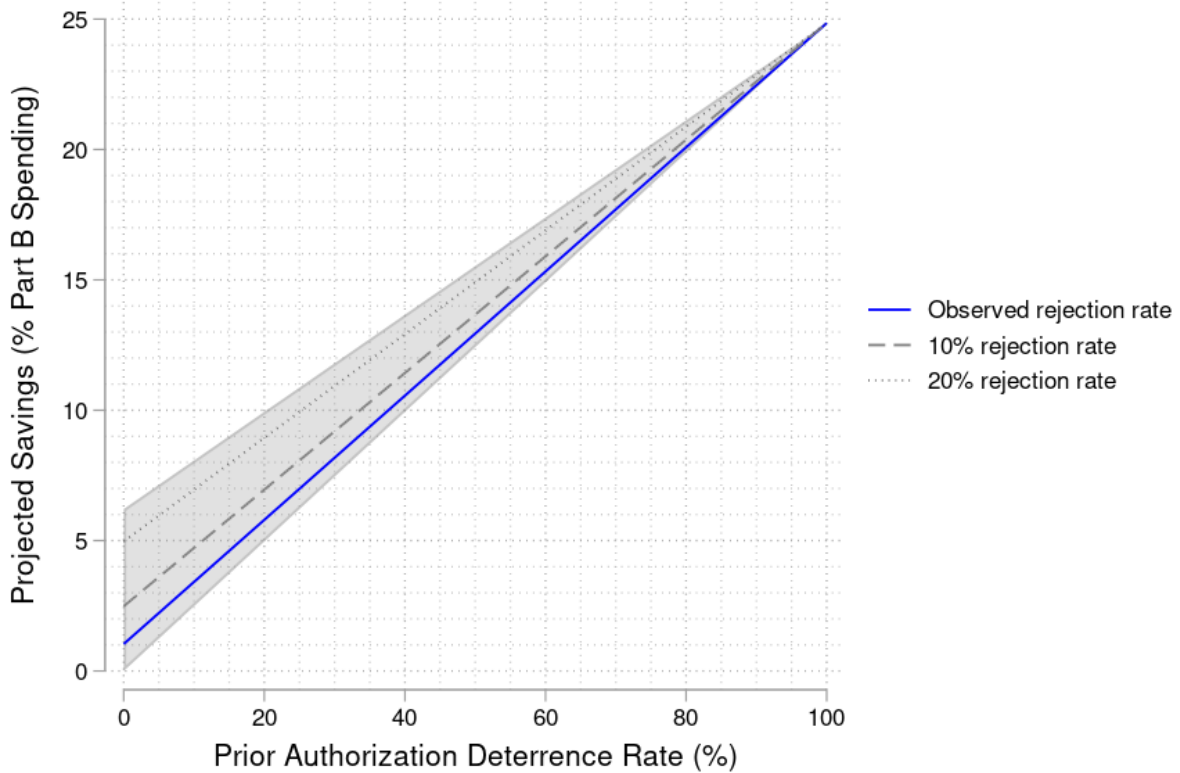

Notes: The figure illustrates projected gross savings on services qualifying for prior authorization under alternate scenarios. Scenarios vary according to the rate at which prior authorization applications are rejected, and the rate at which prior authorization services are deterred (i.e. without an application filed). The gray zone includes estimates with rejection rates ranging from 0% to 25%. The solid line assumes the observed average rejection rate of 4.2%.
